1 **Exploring community-based reporting of livestock abortions for Rift Valley Fever**  
2 **surveillance in Uganda: A pilot study**

3

4

5 Abel Wilson Walekhwa<sup>1,2\*</sup>, Andrew JK Conlan<sup>1</sup>, Stella Acaye Atim<sup>6,7</sup>, Anna Rose  
6 Ademun<sup>6</sup>, Emmanuel Hasahya<sup>3,6</sup>, James L.N. Wood<sup>1</sup> and Lawrence Mugisha<sup>4,5</sup>.

7

8

9 **Affiliations**

10 <sup>1</sup>Diseases Dynamics Unit, Department of Veterinary Medicine, University of Cambridge.

11 <sup>2</sup>IDEMU Mathematical Modelling Unit, Kampala, Uganda

12 <sup>3</sup>International Livestock Research Institute (ILRI), Kampala, Uganda

13 <sup>4</sup>Makerere University College of Veterinary Medicine, Animal Resources and Biosecurity,  
14 Kampala, Uganda

15 <sup>5</sup>Ecohealth Research Group, Conservation and Ecosystem Health Alliance (CEHA), Kampala,  
16 Uganda

17 <sup>6</sup>National Animal Disease Diagnostics and Epidemiology Centre, Ministry of Agriculture,  
18 Animal Industry and Fisheries, Entebbe, Uganda

19 <sup>7</sup>MRC/UVRI and LSHTM Uganda Research Unit, Entebbe Uganda

20 **Corresponding Author**

21 Abel Wilson Walekhwa, [wabelwilson@gmail.com](mailto:wabelwilson@gmail.com)

22

23 **Word count**

24 Abstract: 299

25 Manuscript: 5,970

26 **NOTE: This preprint reports new research that has not been certified by peer review and should not be used to guide clinical practice.**

27 **Abstract**

28 Between March and June 2023, we carried out a pilot study to explore the feasibility of using  
29 self-reporting of livestock abortions as a method of syndromic surveillance for Rift Valley  
30 fever disease (RVF) in Isingiro District, Uganda. We established a call centre in the office of  
31 the District Veterinary Officer which was promoted through stakeholder meetings, media  
32 engagement and distribution of sensitization materials.

33 We collected 200 sera and 269 vaginal swabs from cattle, sheep and goats that experienced an  
34 abortion within a target 14-day period. The apparent IgG seroprevalence of RVF was 38%  
35 [95% CI 29 – 47] in cattle, 33% [95% CI 14 – 61] in sheep and 20% [95% CI 12 – 31] in goats.  
36 For IgM, sheep showed the highest prevalence at 8% [95% CI 1 – 35], cattle at 2% [95% CI 1  
37 – 6]. Host species was significantly associated with IgG positive status, with cattle having the  
38 highest risk of RVF seropositivity (OR = 3 [95%CI: 1 - 7], p = 0.014).

39 Our results demonstrate the potential for a community led model for collecting abortion alerts  
40 through local call centres. If routinely implemented, such syndromic data collection could be  
41 used to develop early warning systems and prioritise case investigations. The IgG  
42 seroprevalence in our sample is comparable to the levels seen in endemically infected  
43 countries, suggesting historical circulation of RVF within the livestock population in this  
44 community. Our pilot study demonstrates a proof-of-principle that community-driven reporting  
45 of abortions could be used to build a surveillance system for RVF. However, the lack of  
46 confirmation of infection through PCR means we cannot draw a firm causal link between the  
47 reported abortions and RVF. To build a robust case of abortion surveillance, longitudinal  
48 studies are needed to measure seasonal variation in the distribution of abortion cases and  
49 incidence of active RVF infections.

50 **Key words:** *Livestock abortions, surveillance, Rift valley fever, Uganda.*

51

52

53

54

## 55 **Author's Summary**

56 Rift Valley fever disease is a growing zoonotic disease with high potential to disrupt national  
57 and international trade and biosecurity. In this work, we contribute to the epidemiology of RVF  
58 in Uganda and propose a system for self-reporting of livestock abortions that could provide a  
59 pathway to syndromic surveillance for RVF and thus contribute to safer human and animal  
60 communities. Engaging communities in setting up call centres for early notification and follow-  
61 up of animal diseases is a cost-effective and participatory approach which could be sustainable  
62 even with limited resources. Livestock abortions are a common symptom for other diseases  
63 like Q-fever, brucellosis, campylobacter among others and therefore, caution should be used  
64 when using it as an early warning signal for RVF. Establishing routine reporting could  
65 potentially allow for the identification and association of patterns of abortions with different  
66 infections. Our pilot study demonstrates the feasibility and active interest and engagement from  
67 farmers for such a surveillance system.

## 68 **Background**

69 Rift valley fever disease (RVF) is a zoonotic mosquito-borne viral infection caused by the Rift  
70 valley fever virus (RVFV), a member of the genus *Phlebovirus* and family *Bunyaviridae*  
71 (Sasaya et al., 2023). The disease is primarily transmitted by *Aedes* and *Culex* mosquitoes and  
72 blood feeding flies (Ebogo-Belobo et al., 2023). The virus was identified in 1931 during an  
73 epidemic among sheep on a farm in the Kenyan Rift Valley (Bailey, 1988; Hartman, 2017)  
74 affecting both livestock and wildlife (Clark et al., 2018). In humans, infection with RVFV leads  
75 to clinical outcomes ranging from a mild flu-like illness to severe haemorrhagic fevers with  
76 mortality rates of up to 27% (Ebogo-Belobo et al., 2023). The disease has the potential to  
77 disrupt countries' livestock production due to mortalities (Ahmed et al., 2019). In lieu of the  
78 potential for RVF to cause economic disruptions, the World Health Organisation (WHO) and  
79 Food Agricultural Organisation and World Organization for Animal Health (WOAH) have  
80 prioritized it among the key zoonotic diseases that have pandemic potential (Jenkin et al.,  
81 2023). The African Union Commission (AUC) has ranked it among the priority diseases for  
82 Africa, while in Uganda it is ranked third on the list of priority zoonotic diseases (PZDs)  
83 together with other viral haemorrhagic fevers (VHFs) including Ebola, Marburg and Crimean-  
84 Congo Haemorrhagic fever (Sekamatte et al., 2018) by the Global Health Security Agenda  
85 (Kabami, 2023; Muturi et al., 2023). In some African countries like Sudan, Uganda, RVF has

86 been reported as causing 10% mortality among adult livestock and abortions in ~ 80-90%  
87 pregnant animals (Bird et al., 2009; Birungi et al., 2021; Hassan et al., 2020).

88 Uganda reported the isolation of the RVFV from mosquitoes in 1944 in Semliki Forest,  
89 Western Uganda (Dick, 1953). However, the first laboratory confirmed cases from animals and  
90 humans were not reported until 2016 from Kabale District (Shoemaker et al., 2019). Since then  
91 there have been sporadic RVF outbreaks in different parts of the country and these have been  
92 investigated by Ministry of Health (MoH) and Ministry of Agriculture, Animal Industries and  
93 Fisheries (MAAIF)'s surveillance departments (Aceng et al., 2023; Birungi et al., 2021;  
94 Kabami, 2023; Nyakarahuka et al., 2018a, 2023c, 2023a; Tumusiime et al., 2023a, 2023c).  
95 However, RVF surveillance is typically only carried out responsively after outbreaks that have  
96 already led to the loss of human lives or livestock. Proactive early warning surveillance systems  
97 based on known signs and symptoms, such as anomalous patterns of abortion in livestock,  
98 could help to minimize human RVF incidence and to promote livestock health (Gachohi et al.,  
99 2024).

100 The rate of abortion among pregnant ewes is reported to be almost 100% and over 90% of  
101 lambs infected with RVF die (WHO, 2022). Livestock abortions are a well-documented  
102 production and economic burden to farmers, especially among livestock farming communities  
103 and countries that depend on agriculture (Gachohi et al., 2024; Kaur et al., 2023; Lokamar et  
104 al., 2020). In addition to the lost fetuses, abortion poses an additional excess mortality risk for  
105 female animals (Muma et al., 2006). Livestock owners lose the potential financial benefits that  
106 would be achieved through the sale of lost animals and animal products including beef, hides,  
107 skins and milk (Kabami, 2023; Muturi et al., 2023).

108 Budasha et al. conducted a random cross sectional study of livestock abortions in Kisoro  
109 district, Uganda (close to our study area in Isingiro) and reported an overall prevalence for  
110 livestock abortions of 17% with sheep having the highest prevalence of all livestock kept in  
111 the district (Budasha et al., 2018). Our study was motivated by Budasha et al. and de Glanville,  
112 W. A. et al.'s observation that RVF antibodies could be detected in abortions and their  
113 recommendation that these could be used as an early warning signal for RVF in endemic areas  
114 (de Glanville et al., 2022; Glanville et al., 2022). In Uganda and many African countries where  
115 animal health surveillance is not systematic (Hasahya et al., 2023; Qiu et al., 2023) livestock  
116 abortions are neither routinely documented nor reported for action, yet could be leveraged as  
117 cost-effective proxies for arboviruses surveillance in ruminants (Walt et al., 2023).

118 In this project we piloted a community led reporting system for abortions based on farmers  
119 self-reporting using phones. Reports were followed up by investigation and collection of  
120 samples to establish the potential exposure to RVF among recent cases of abortion (less than  
121 14 days) using ELISA. ELISA kits are commonly used in low-resource settings (Domfe et al.,  
122 2022) and are recommended by the World Organization for Animal Health for the purpose of  
123 estimating the prevalence of infection of RVF (Petrova et al., 2020). A similar syndromic  
124 surveillance system piloted in rural settings of Kenya showed that animal health illness events  
125 were 15 times more likely to be reported by phone-based surveillance than home visits by  
126 veterinary health workers (Thumbi et al., 2019). Thumbi et al. recommended that a phone-  
127 based surveillance system could be implemented to enable the early detection of zoonotic  
128 diseases like RVF (Thumbi et al., 2019). In our project, we built on the methodology of Thumbi  
129 et al. adding publicity through social media channels, community sensitizations to increase  
130 awareness, and laboratory confirmation of reported and investigated abortions cases in  
131 livestock with a focus on RVF.

## 132 **Materials and Methods**

### 133 **a) Study area**

134 Isingiro district (0.84° S, 30.80° E) is located in southwestern Uganda, about 297 kilometres  
135 from the capital city, Kampala, and 47 km from Mbarara city. Isingiro shares a border with  
136 Tanzania in the south and three further districts of Uganda: Kiruhura, Rakai and Ntungamo  
137 (Fig 1). These districts are characterised by livestock rearing being the major industry on which  
138 residents depend for their livelihood (Adonia, 2013; Bwengye et al., 2023; Mubiru et al., 2023).  
139 The district also neighbors Lake Mburo National Game Park which harbours wildlife species  
140 susceptible to RVF. Both wildlife and livestock share common water sources, along the shores  
141 of Lake Mburo and the Kagera River which spans the district. Isingiro district has an estimated  
142 cattle, goats and sheep of population of 368,246, 422,108 and 88,621 respectively (UBOS,  
143 2024) and human population of 486,360 based on projections from human 2014 census  
144 respectively (Tumusiime et al., 2023a;). Isingiro district has 35 lower administrative units  
145 (sub counties) with 18 where animal rearing is conducted. The district experiences a tropical  
146 savannah climate with an average annual rainfall of 1200mm, and a temperature range of 17 -  
147 30°C (Kweyu et al., 2023; Nagasha et al., 2019). The district has two rainy seasons in each  
148 year: March to April, and September to November. The people in this area rear livestock and  
149 practice crop agriculture as their main economic activities (Taremwa et al., 2020).

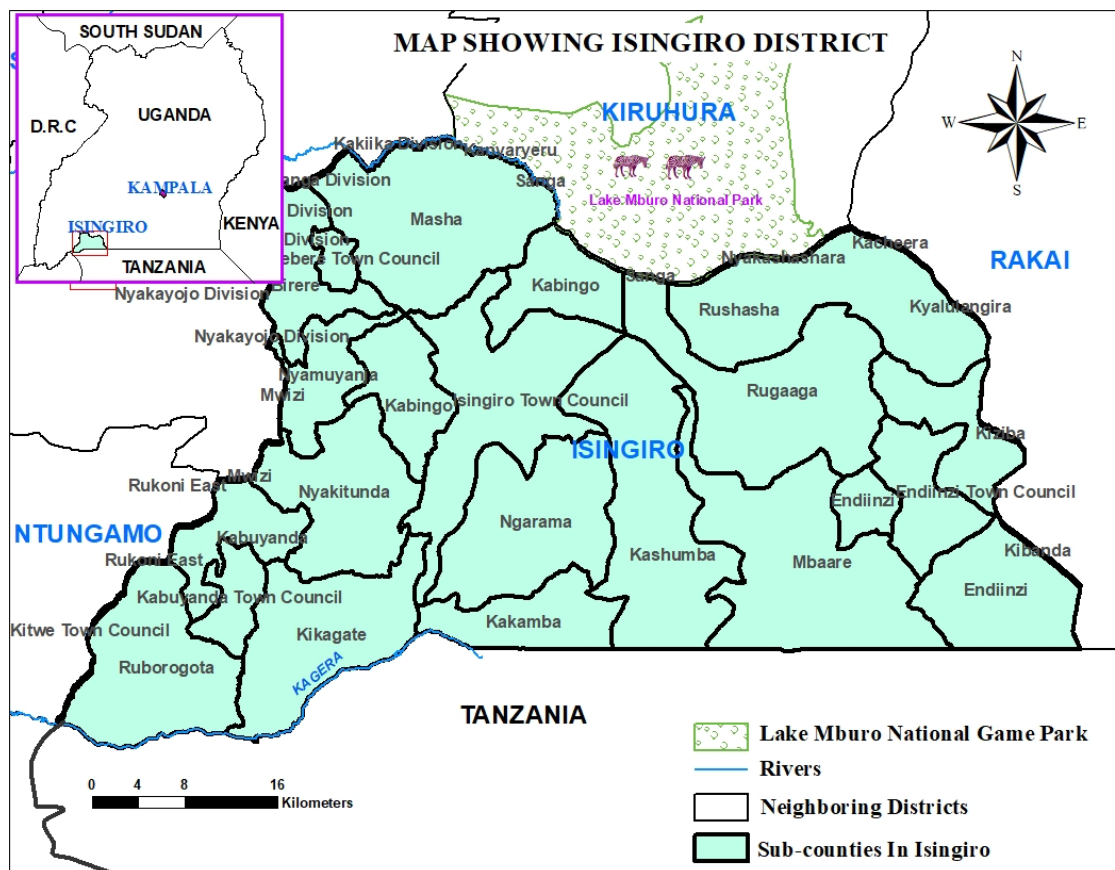

150

151 **Figure 1: Map of Uganda showing Isingiro District and sites for sample collection**

152 **a) Study Design**

153 We conducted a cross sectional study from March to June 2023. A call centre was established  
154 in consultation with livestock owners (farmers), local authorities and District Veterinary  
155 Officers (DVO), to receive and record reported livestock abortions. First, we carried out formal  
156 entry/information meetings to explain the purpose of the study, the information to be collected,  
157 how they were expected to participate and how to use the call centre. Further meetings were  
158 held with staff at the National Animal Diseases Diagnostics Epidemiological Centre  
159 (NADDEC), MAAIF and local veterinary caregivers briefing them on procedures for sample  
160 collection, packing and transportation to the laboratory in Entebbe for analysis.

161 The call centre was officially established in the office of the DVO at Isingiro district on 1<sup>st</sup>  
162 March 2023 and co-managed by the corresponding author and a local contact officer who  
163 served as a liason person between this project and the DVO (Figure 2). Following the official  
164 set-up of the call centre, we were keen to follow-up abortion alerts that had occurred within the  
165 target 14 days period (14<sup>th</sup> February 2023 onwards). However, we also considered and  
166 responded to abortion cases which had occurred before the set-up of the call centre.

167 Establishment of the call centre was followed by different stakeholder engagements through  
168 meetings and mass sensitization of livestock owners and local leaders. Information Education  
169 and Communication (IEC) materials on RVF were created. These materials were then  
170 distributed to public gatherings, barazas and similar events to advocate for the reporting of  
171 abortions.

172 The contact officer was provided with a data collection tool, KoboCollect  
173 (Lakshminarasimhappa, 2022) installed on android phones which enabled tracking of all  
174 incoming calls regarding livestock abortions. At the design phase we expected that these  
175 phones could facilitate reporting through phone calls, SMS, and social media alerts (WhatsApp,  
176 Facebook) in addition to verbal reporting through walk-ins to the office. We set up two days'  
177 of orientation meetings with different stakeholders including the research team that we had  
178 recruited. During these meetings, the participants were taken through the line-up of activities  
179 and their expected roles. This was necessary to ensure that stakeholders appreciated the scope  
180 of the project and would be more likely to support it. For the research team this was necessary  
181 as it helped them to understand the project protocol. On the last day of the orientation, consent  
182 was sought and a social media channel group ([WhatsApp](#)) was formed. This was done to  
183 coordinate the reporting of livestock abortion reports across the district. High-level  
184 coordination of activities and events was carried out through a separate social media group  
185 (WhatsApp group) which included the corresponding author, District Health Officer (DHO),  
186 DVO, Assistant District Health Officer-Environmental Health (ADHO-EH), call centre staff  
187 and all research assistants. There were also weekly update meetings organised to review  
188 progress.

189 We provided two telephone numbers (the DVO and the contact officer) on materials to enable  
190 livestock abortions to continue to be reported after the end of the project. IEC materials in the  
191 form of flyers and brochures (in English, S2 Appendix and S3 Appendix) were adapted from  
192 RVF risk communication materials created by the Ugandan Ministry of Health. These materials  
193 were distributed and displayed in public places in the community and provided to local  
194 authority leaders for use in addressing the public during community/social events like burials,  
195 ceremonies, radio talk shows and community barazas. We also made announcements on local  
196 radio and carried out sensitizations with community health workers. To inform the necessary  
197 scale of the study we carried out a sample size calculation to ensure we could estimate the  
198 expected prevalence ( $p$ ) in the area to a reasonable precision ( $d$ ). We used the Kish-Leslie  
199 formula ( $n = z^2pq/d^2$ ) where the desired confidence interval was taken to be 95% (5%

200 significance level) and expected prevalence of RVF during abortions (effect size) was taken as  
201 21% (De Glanville, Allan et al. 2022) which gave a target sample size of 325.

## 202 **Field data collection**

203 To provide capacity building in the local area and in an attempt to build in sustainability for  
204 our project, we identified and recruited veterinary and laboratory staff employed in the Isingiro  
205 district into the project. Working with staff that were already employed in this study area was  
206 not only cost-effective but later proved beneficial as it enabled expedition of activities as the  
207 local staff understood the local geography which eased the logistics of data collection. Through  
208 this project, we brought on board both veterinary staff working in public and private practice.  
209 In preparation for fieldwork, these veterinary and laboratory staff were given safety training on  
210 laboratory Standard Operating Procedures (SOPs), use of Personal Protective Equipment  
211 (PPE), human handling and restraint of animals. These SOPs enabled staff to adhere to animal  
212 welfare principles, but also to ensure personnel safety and adherence to biosecurity measures  
213 to curtail spread of disease between farms. The team was also trained on the approved study  
214 protocol and data collection tools for two days.

215 The investigation team was provided with equipment and consumables for collecting sera and  
216 vaginal swabs from aborted livestock. We responded to 78% (329/423) of the reported alerts.  
217 This was intended to inspire farmers to report abortion alerts to the call centre. After every  
218 alert, there was an investigation by the corresponding author and the veterinary staff. During  
219 these investigations, a questionnaire was used to collect background information from the  
220 animal owners/farmers. The collected information included key demographic and  
221 epidemiological variables such as herd size, RVF vaccination history, alert channel used,  
222 environmental factors like stagnate water, presence of shrubs/forests, irrigation dams,  
223 vegetation cover, economic activities. The blood and vaginal swab samples collected were  
224 transported in ice-conditioned icepacks (approximately four hours after sample collection) to  
225 Rwenkubo Health Centre IV (central laboratory hub for Isingiro district) and were stored at  
226 -20°C. This laboratory received daily vaginal swab samples from the veterinary staff. We  
227 collected 200 sera samples and 269 vaginal swabs and transported to NADDEC for analysis,  
228 which were then tested for both RVF and Brucellosis. The samples were transported through  
229 the Ministry of Health accredited National Laboratory system (Hub) (Kiyaga et al., 2013) under  
230 cold chain conditions specified by the manufacturer to the central testing laboratory  
231 (NADDEC) (Monje et al., 2021). Due to budgetary constraints these have not yet been  
232 analysed.



233 **d) Laboratory analysis**

234 Blood samples were tested by Enzyme-linked immunosorbent assay (ELISA) for anti- RVF  
235 and anti- Brucella antibodies using validated commercial kits. Brucella has a high prevalence  
236 in Uganda (Bugeza et al., 2023) compared to other infections associated with abortion storms  
237 (Akwongo and Kakooza, 2022; Aruho et al., 2021; Muma et al., 2006). For RVF we used the  
238 RVF competitive multi-species ELISA Kit (ID VET, Montpellier, France) (Petrova et al.,  
239 2020). Although vaccination against RVF could stimulate the production of specific antibodies  
240 producing a positive IgM test result (Matsiela et al., 2023) vaccine status of animals was  
241 verified with farmers with none reporting they had purchased or used vaccines for RVF.  
242 Brucella assays were done using IBL - America IgG-ELISA Kits (Minneapolis, MN) as  
243 described by Nyamota et al (Nyamota et al., 2023).

244 **e) Statistical Analysis**

245 All data analyses were carried out using R statistical software version 4.3.1 (R Core Team  
246 (2023), n.d.). Confidence intervals (CI) for the binomial proportion of apparent prevalence of  
247 exposure to RVF and Brucella were calculated using the Clopper-Pearson method as  
248 implemented in the “binomial” function of the “DescTools” package (Signorell A (2023), n.d.).  
249 We developed logistic regression models to identify factors associated with test-positivity for  
250 RVF. The small number (3/184) of IgM positive sera found precluded their use for this purpose,  
251 so we used IgG test status as the dependent variable. Following univariate screening for farm  
252 level risk factors (S1 Table) with a cutoff of  $p < 0.2$  for inclusion in a multivariable model, we  
253 developed a multivariable model. Known biological risk factors (stage of pregnancy, animal  
254 host, history of animal movements, environmental conditions) were also forced into the  
255 multivariable model regardless of the univariate significance (Nyakarahuka et al., 2023c). The  
256 associations were assessed by odds ratios, with a 5% level for statistical significance. Time  
257 series data were visualised using ggplot2 (Hadley Wickham, 2016) and the tidyverse packages  
258 (Hadley et al, 2019). We tested the logistic regression output for 174 samples collected during  
259 the target period (less than 14 days) and found minimal changes to the qualitative model results.

260

261

262

## 263 **Results**

264 At the planning phase of the fieldwork (21<sup>st</sup> January 2023), there were a small number (5) of  
265 reports of livestock abortions that had been recorded by the DVO's office independent of our  
266 study (Fig 2, S2 Table). We received a total of 53 call alerts leading to 423 abortions reported  
267 during the pilot from 53 farms/herds owners and 184 of these alerts were investigated and for  
268 this paper we report 184 samples (S3 Table). The number of samples collected during the target  
269 period were 174 with 10 that occurred before the establishment of the call centre. The ten  
270 abortions that occurred before establishment of the call centre were all from cattle reported  
271 from Bugango Town Council (6/10) and Mbaare subcounty (4/10). The 4/10 and 6/10 were  
272 estimated to be at early stage and middle of pregnancy respectively (S2 Table). All of the  
273 reports were through telephone calls as opposed to social media platforms like facebook and  
274 WhatsApp. There was high interest in participating in this pilot and demand from farmers to  
275 understand the cause for the livestock abortions. This pilot had been planned to take place over  
276 six months but due to the high rate of reports, and delay in starting due to logistic factors, it  
277 was completed within three months (Fig 2). Regarding the delay between the date of reporting  
278 and investigation, the majority were in less than one day. However, the mean delay was skewed  
279 to the right due to few cases that were reported before setting up the call centre (S1 Appendix).

### Time series for Number of Reported Livestock Abortions in Isingiro District, Uganda

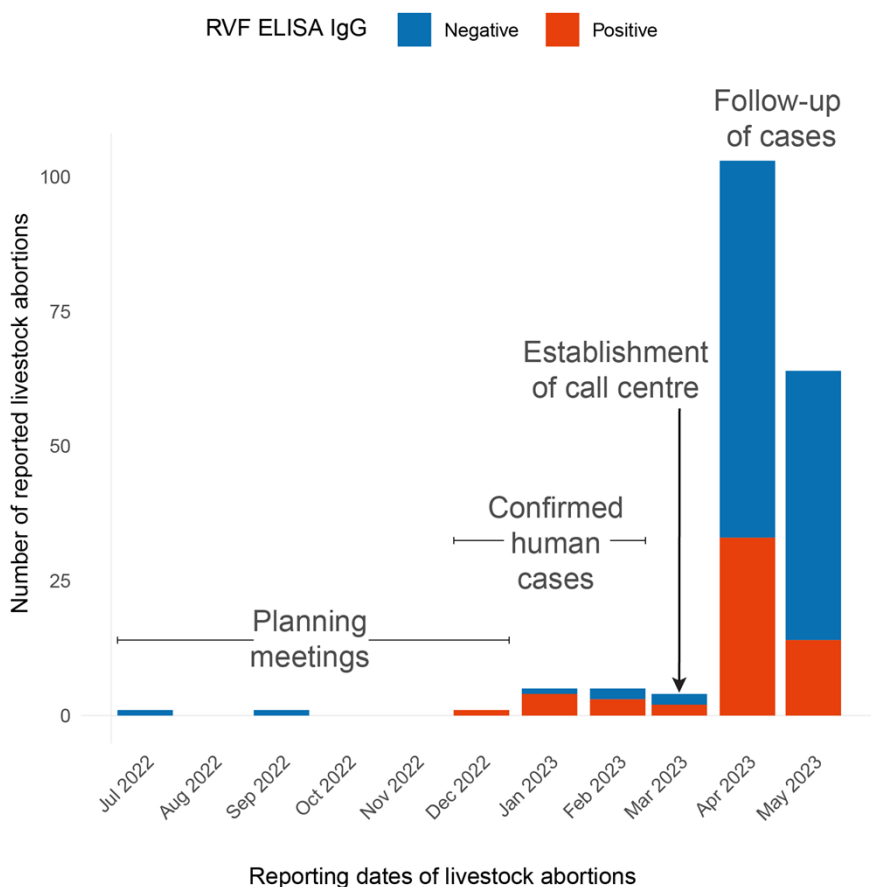

280

281 **Figure 2: Time-series for livestock abortions reporting in Isingiro District, Uganda**

282 Of the collected samples from abortions, the greatest number 106/184 (58%) were from cattle,  
283 followed by goats 66/184 (36%). The majority of cattle were crossbred 25/52 (48%) and 22/52  
284 (42%) were local breeds. There was no history of RVF vaccination reported by farmers and the  
285 majority (98%) did not report any history of cross-border or inter-district movement. The  
286 median number of livestock abortions reported per herd was (4.0; IQR 3.0). The majority of  
287 our reporters were male 158/184 (86%) and 159/184 (86%) described herdsman as their main  
288 occupation. The median household size was 10; IQR 4.25 with majority, 81/184 (44%)  
289 described with no formal education. The reported clinical presentation of animals at farm level  
290 included; sudden onset of abortion among pregnant animals, weakness, unsteady gait,  
291 mucopurulent nasal discharge, profuse fetid diarrhoea and high fever. The observed  
292 environmental and climatic factors near the livestock farms and homestead included; bushes,  
293 recent rainfall (less than 14 days), heavy forests and stagnant water. The reported abortions  
294 originated from 18/33 (61%) of the sub counties where livestock was reared (S1 Table).

295 The seroprevalence of RVF IgG in cattle was 38% [95%CI 29 – 47], 33% in sheep [95%CI 14  
 296 – 61] and 20% in goats [95%CI 12 – 31]. The IgM seroprevalence was lower, with 8% in sheep  
 297 [95%CI 1 – 35] followed by cattle at 2% [95%CI 1 – 6]. With respect to brucellosis, goats had  
 298 a seroprevalence of 36% [95%CI 25 – 49]; 16% of cattle were positive [95%CI 11 – 23] but  
 299 no sheep tested positive (Table 1).

300 **Table 1: Serological results for RVF and Brucellosis**

| RVF IgG                        | Host         | Apparent prevalence of exposure (%) (95% CI) | Negative | Positive | Total number of animals, n (%) |
|--------------------------------|--------------|----------------------------------------------|----------|----------|--------------------------------|
|                                | Cattle       | 38 (29 - 47)                                 | 66       | 40       | 106 (58%)                      |
| Goats                          | 20 (12- 31)  | 53                                           | 13       | 66 (36%) |                                |
| Sheep                          | 33 (14 - 61) | 8                                            | 4        | 12 (6%)  |                                |
| RVF IgM                        | Cattle       | 2 (1 - 6)                                    | 104      | 2        | 106 (58%)                      |
|                                | Goats        | 0                                            | 66       | 0        | 66 (36%)                       |
|                                | Sheep        | 8 (1 - 35)                                   | 11       | 1        | 12 (6%)                        |
| IgG Brucellosis ELISA          | Cattle       | 16 (11 - 23)                                 | 106      | 20       | 125 (63%)                      |
|                                | Goats        | 36 (25 - 49)                                 | 37       | 21       | 58 (29%)                       |
|                                | Sheep        | 0                                            | 16       | 0        | 16 (8%)                        |
| Both IgG (RVF and Brucellosis) | Cattle       | 9 (5 - 15)                                   | 54       | 9        | 106 (58%)                      |
|                                | Goats        | 2 (0 - 8)                                    | 42       | 1        | 66 (36%)                       |
|                                | Sheep        | 25 (9 - 53)                                  | 5        | 3        | 12 (6%)                        |

301  
 302 Sheep were the species most likely to be positive to both RVF and brucellosis tests with 25%  
 303 [95% CI 9 – 53] positive to IgG and the Brucellosis IgG ELISA, followed by cattle at 9% [95%  
 304 CI 5 – 15] and lastly goats at 2% (95%CI 0 - 8) (Table 1).

305 Only one risk factor (host species) was statistically significantly associated with RVF IgG  
 306 status. Cattle had the highest risk of positivity than goats and sheep (OR = 2.9 [95%CI: 1.27 -  
 307 7.07], p = 0.014). The presence of any favourable conditions (*Bushes, Recent rainfall (less than*  
 308 *14 days), Heavy forests, Stagnant water*) near the farm/herd (OR = 1.5 [95%CI: 0.6 - 4.0], p =  
 309 0.4) and history of movement (OR = 3.0 [95%CI: 0.1 - 71.0], p = 0.5) were not statistically  
 310 significant in our sample despite their previously reported associations with risk of exposure to  
 311 RVF (Table 2). As a sensitivity analysis, we refitted the multivariate model excluding the small

312 number (10) of reports where the delay between alert and investigation was greater than 14  
 313 days. The qualitative results in terms of identified risk factors and magnitude of effects were  
 314 unchanged for the smaller data set.

315

316 **Table 2: Multivariate regression model output for IgG RVF occurrence and associated**  
 317 **risk factors**

| Variable                                               | Number<br>n | Estimate | Std Error | Z value | OR <sup>1</sup> | 95% CI <sup>1</sup> | p-value       |
|--------------------------------------------------------|-------------|----------|-----------|---------|-----------------|---------------------|---------------|
| <b>Animal Hosts</b>                                    |             |          |           |         |                 |                     |               |
| Goats                                                  | 66          | REF      | -         | -       | -               | -                   | -             |
| Cattle                                                 | 106         | -1.07    | 0.44      | 2.45    | 2.9             | 1.3, 7.1            | <b>0.014*</b> |
| Sheep                                                  | 12          | 1.012    | 0.73      | 1.39    | 2.8             | 0.6, 11.3           | 0.2           |
| <b>Stage of animal pregnancy</b>                       |             |          |           |         |                 |                     |               |
| Early stage<br>(1-3<br>months)                         | 73          | REF      | -         | -       | -               | -                   | -             |
| Middle<br>stage (4-6<br>months)                        | 62          | -0.74    | 0.48      | -1.51   | 0.5             | 0.18, 1.2           | 0.13          |
| Late stage<br>(7-9months)                              | 45          | -0.56    | 0.41      | - 1.37  | 0.6             | 0.3, 1.3            | 0.20          |
| Not sure                                               | 4           | -16.77   | 1181.54   | - 0.01  | 0.0             | -                   | 1.0           |
| <b>Environmental features at the farm/herd level</b>   |             |          |           |         |                 |                     |               |
| A**                                                    | 81          | REF      | -         | -       | -               | -                   | -             |
| B**                                                    | 52          | 0.34     | 0.41      | 0.83    | 1.4             | 0.6, 3.2            | 0.41          |
| C**                                                    | 15          | 0.19     | 0.74      | 0.25    | 1.2             | 0.2, 4.8            | 0.80          |
| D**                                                    | 36          | 0.43     | 0.48      | 0.90    | 1.5             | 0.6, 4.0            | 0.37          |
| <b>History of Animal movement</b>                      |             |          |           |         |                 |                     |               |
| No                                                     | 181         | REF      | -         | -       | -               | -                   | -             |
| Yes                                                    | 3           | 0.96     | 1.47      | 0.65    | 2.6             | 0.1, 71.0           | 0.52          |
| <sup>1</sup> OR = Odds Ratio, CI = Confidence Interval |             |          |           |         |                 |                     |               |

318 *\*Statistically significant variable*

319 *\*\*A: Bushes, Recent rainfall (less than 14 days), Heavy forests, Stagnant water. B: Only 03*  
 320 *present; Bushes, Stagnant water, Heavy forests. C: Only two present; Bushes, Recent rainfall*  
 321 *(less than 14 days). D: Only one present.*

322  
323  
324  
325  
326  
327  
328  
329  
330  
331  
332  
333  
334  
335  
336  
337  
338  
339  
340  
341  
342  
343  
344  
345  
346  
347  
348  
349  
350  
351  
352  
353  
354  
355

## Discussion

This study is the first of its kind in Uganda, testing a community-led system for reporting livestock abortions to detect Rift Valley Fever (RVF). After setting up a call center in Isingiro district, most incidences of abortion were reported, recorded in the log book and cattle showed the highest RVF prevalence, followed by sheep and then goats. Regarding brucellosis, goats had the highest prevalence than cattle. These findings align with previous research conducted in Uganda and Kenya (Birungi et al., 2021; Kabami, 2023; Ndumu et al., 2021; Nyakarahuka et al., 2018a, 2023a, 2023b, 2023c; Nyamota et al., 2023; Tumusiime et al., 2023b).

Through this pilot we have demonstrated the feasibility of setting up a call centre for abortions. Such call centres are particularly valuable for animal disease surveillance in settings like Uganda where the majority of livestock farmers have phones but do not necessarily have internet access. When a similar pilot study was carried out in Kenya the authors recommended pathogen specific abortions reporting and investigation which our work has contributed to (Gachohi et al., 2024). Such call centres can provide added value to both farmers and policy makers. For example, farmers can seek technical guidance on farm management and have the opportunity to report any unusual or suspected conditions at the farm. At a policy level, they can complement existing surveillance infrastructure at Uganda's Ministry of health and office of the Prime Minister such as the national level emergence operations centre (Ario et al., 2022) and the National One Health Platform (Buregyeya et al., 2020) respectively. These organisations have technical staff who can analyse and interpret phone reports. Furthermore, from the animal health sector perspective, the set up of a national level abortions surveillance system could build on existing systems like the electronic infectious diseases surveillance (eIDS) system under MAAIF. Looking beyond Uganda, neighbouring Kenya has already established such an integrated animal health system (Njenga et al., 2021). Setting up call centres has been previously championed under the Ministry of Health Uganda during both peak moments of different epidemics such as the SARS-CoV2 pandemic (Katana et al., 2024), for Ebola Virus disease (Kiggundu, 2022) and for longer-term endemic infections such as HIV/AIDS and Tuberculosis. Establishing district-level call centres in DVO offices to facilitate livestock abortions reporting could provide a cost-effective and sustainable path to improve animal health surveillance in Uganda.

356 Syndromic surveillance is cheap as most people/farmers have phones, although the follow-  
357 up/investigation of such reported cases may be expensive and require government investment.  
358 Investment in development of pen-side diagnostics for RVF or by expanding access to existing  
359 diagnostics through commercial or social enterprises could play an important role in addressing  
360 this limitation. However, the high costs of investigating reported cases could also be minimised  
361 by prioritising investigation of anomalous reports of abortions (either seasonally or  
362 geographically). Establishing such criteria will require a longer, and more geographically  
363 representative study than was possible for this pilot. Syndromic surveillance based on livestock  
364 abortions may be imprecise in estimating the risk of RVF, due to the other circulating diseases  
365 like brucellosis and Q-fever which will contribute to abortions, but is likely to be cheaper than  
366 entomological surveillance. We found a high demand and interest from farmers to participate  
367 in an abortion surveillance programme as they were eager to know the causes. This interest  
368 could be leveraged to promote community level reporting through call centres. The access and  
369 utilization of such point-of-care diagnostics would be built on grounds that farmers are willing  
370 to invest in diagnosing and treating their sick animals.

371

372 Our results suggest that RVF was circulating among livestock within these communities as  
373 evidenced by high IgG positivity across all livestock species. The relatively lower IgM  
374 positivity is suggestive of less current circulation despite the confirmed presence of RVF in  
375 four districts of Isingiro, Mbarara, Rubanda and Kazo in the 16<sup>th</sup> – 20<sup>th</sup> epidemiological weeks  
376 (Kabami, 2023). The presence of RVF antibodies in Isingiro district could also be explained  
377 by previous outbreaks in 2018, 2020 (Nyakarahuka et al., 2023c). The nationwide  
378 seroprevalence study by Nyakarahuka et al showed that RVF was circulating in over 37/135  
379 districts across the five regions in Uganda (Nyakarahuka et al., 2023c). An ecological niche  
380 model for Uganda also suggested that Isingiro district was a high risk area and the authors  
381 recommended surveillance activities to be targeted in such areas (Tumusiime et al., 2023a). In  
382 comparison with Kenya's IgG RVF cattle seroprevalence picture (an indication to previous  
383 exposure to RVF), Owange et al reported 13.1% (183/1396) in 2014 (Owange et al., 2014a),  
384 Nanyingi et al reported 33.3% (95% CI [6.7–60]) in 2017, Bett et al reported 37.10% (30.72 –  
385 43.84) in 2018. Our IgG seroprevalence of 38% is not dissimilar to that seen in endemically  
386 infected populations, however our study population of animals with recent abortion might be  
387 expected to be at a higher risk of exposure.

388

389 In our study, abortions were reported across different stages of pregnancy, ranging from early  
390 to late stages, which would be highly suggestive of endemic RVF (Oymans et al., 2020).  
391 According to the World Organization of Animal Health differential diagnosis of livestock  
392 diseases, RVF is expected to cause abortion storms (for epidemic) conditions but under  
393 endemic conditions it repeatedly causes abortions at different stages of pregnancy (Gerdes,  
394 2004), as reported here.

395

396 We found animals with both RVF and brucellosis antibodies. Given that our entry point was  
397 livestock abortions to confirm potential causes, our screening for RVF and brucellosis was  
398 important as both are likely to contribute to the occurrence of abortions. This finding  
399 underscores the need to set up integrated livestock diseases surveillance which could be  
400 supported by development and deployment of point-of-care diagnostics that have multiple  
401 assays. Early warning systems could be designed with different signals to distinguish the  
402 contribution of RVF to observed abortions in comparison to other abortion causing pathogens.  
403 Cattle had a higher risk to be positive for IgG antibodies for RVF. This observed higher risk of  
404 exposure in cattle may simply be done to the longer expected lifespan of this species compared  
405 to sheep and goats. This longer duration could be linked to thus the IgG antibodies. Several  
406 studies have reported similar findings, linking higher prevalence in cattle to the greater  
407 opportunity for exposure to RVF virus (Jeanmaire et al., 2011; Nyakarahuka et al., 2018b;  
408 Owange et al., 2014b). However, this observation is quite different from the historically known  
409 RVF epidemiology which implicates sheep and goats more than cattle (Anywaine et al., 2022;  
410 Birungi et al., 2021). This discrepancy could potentially be explained by the far higher number  
411 of cattle in our study and the distinction between risk of clinical illness and the presence of IgG  
412 antibodies which we measure.

413 Cattle contributed the highest number of samples collected followed by goats and sheep.  
414 Multiple reports/samples taken from the same farm could have skewed distribution towards  
415 cattle, or it may be that farmers were more likely to report cattle due to their value. Previous  
416 studies in Uganda (Nyakarahuka et al., 2018, 2023a, 2023c) and neighbouring countries like  
417 Kenya (Hassan et al., 2020; Muturi et al., 2023) have also found surprisingly low rates of  
418 reports of abortions in sheep. However, the small number of sheep included in the study, means  
419 we could not measure the (relative) risk of infection infection in this species. The small number  
420 of sheep in the study is a representative of national-wide livestock statistics picture, for example



421 the 2021 livestock census showed that Uganda had 17.4 million goats, 14.5 Million cattle and  
422 4.4 million sheep (UBOS, 2024).

423 The risk of introduction of RVF through livestock movements has also been highlighted by  
424 previous studies (Kim et al., 2021; Tigoï et al., 2020). Despite hearing anecdotal reports of  
425 cross-border movements between Uganda and Tanzania throughout Isingiro District through  
426 the porous borders and nomadic grazing grounds, livestock movement was not a statistically  
427 significant factor in our study. This could be a consequence of our sample size but most likely  
428 the fewer number of farms reporting livestock movements. For example only 3/184 farms  
429 reported history of animal movements. The tracking of animal movements in Uganda is not  
430 well established and synchronized (González-Gordon et al., 2023; Hasahya et al., 2023; Payne  
431 et al., 2021). For example, the available animal movement tracking efforts are for those to be  
432 transported on major/highway roads and the motivation is trade and revenue generation. The  
433 movements at sub-national/districts level like our study area is hardly tracked yet such data  
434 would be very important. Even with the minimal animal movements reported could not be  
435 verified at farm level by the research team. In addition, there is poor book keeping at farm level  
436 in our study area. Therefore, there should be caution in interpreting our model output on this  
437 particular variable. We recommend an intentional animal movement registry at farm level that  
438 could synchronize with a national-level database for animal movements. This is specifically  
439 important at farm level because the few national-level tracked animal movements 34% are for  
440 breeding purposes yet this movement poses a risk for disease transmission between farms.

441 We had expected that social media platforms would have enhanced the ease of reporting but  
442 found that telephone was overwhelmingly the preferred mode of reporting livestock abortions.  
443 We attribute this to the rural nature of the study area that is faced with challenges for electricity  
444 and internet connectivity which jeopardises the use of internet-based/online based reporting  
445 systems (J et al., 2023; Lo and Kibalya, 2023). Our results therefore suggest that mobile phones  
446 are still the most effective platform for the establishment of syndromic surveillance system in  
447 low-income countries where internet connectivity is not well developed.

448 Our study area was characterized by environmental features such as shrubs and grass, areas of  
449 stagnant water and the slow flow of River Kagera all of which are likely to contribute to  
450 survival and breeding of the Culex and Aedes mosquito species which are critical for RVF  
451 spread (Muturi et al., 2023; Nanyingi et al., 2015). Given the ubiquity of these features in the  
452 study area it is perhaps not surprising that environmental factors were not identified as risk  
453 factors.

454

455 Our study had a number of strengths; we have piloted the establishment of livestock abortions  
456 reporting/surveillance and showed that this is feasible. We have also demonstrated that  
457 investigation of livestock abortions can aid diagnosis of brucellosis and RVF. We have added  
458 a further justification on the prioritisation of phone-based reporting for community level  
459 disease surveillance in low-income countries where internet/online platforms are not well  
460 developed. We innovatively recruited private veterinary officers/practitioners who sell  
461 veterinary services like drugs to the livestock farmers. The integration of private practitioners  
462 in surveillance could be adopted by MAAIF to help meet the most pressing animal health needs  
463 of the community. We developed RVF IEC materials and built capacity for public health and  
464 veterinary staff working with Isingiro district which is very important for sustainability of  
465 livestock abortions surveillance.

466 There were some limitations in our study; we conducted this study over a relatively short period  
467 (March – June 2023) and could therefore not measure any seasonal patterns in livestock  
468 abortions. The high demand from farmers mean that we exhausted our resources for testing in  
469 only three months (rather than the six months originally planned). Better understanding of the  
470 seasonal pattern of abortions would help the development of early warning systems for RVF  
471 given the strong seasonal risk of exposure driven by mosquito population dynamics. The  
472 demand and willingness for farmers to participate in this pilot study demonstrates the feasibility  
473 of carrying out a longer study in these communities. Extending our study over (at least) a year  
474 and a wider geographic range could allow the association between abortion rates and RVF  
475 transmission to be modelled and potentially to identify early warning signals that do not depend  
476 on expensive diagnostics.

477 We only sampled animals with evidence of recent abortions denying us the opportunity to  
478 assess the risk of RVF in the general livestock population. Being a cross-sectional study, we  
479 cannot test for a causal relationship between livestock abortions and RVF infection. Due to  
480 budget constraints, we only screened for RVF and Brucellosis, yet there are other pathogens  
481 (parasitic, fungal, viral and bacterial) which are also known to cause abortions in livestock (in  
482 particular bluetongue virus, Q fever and *Campylobacter* spp.). Ticks are common in the study  
483 area which could contribute to abortions from other causes.

484

485

486

487

488

489

## 490 **Conclusion**

491  
492 Through this study, we established the feasibility of setting up call centres for surveillance of  
493 livestock abortions in Uganda and found a high prevalence of exposure to RVF in animals that  
494 have recently experienced abortions. The demand and interest of livestock farmers to  
495 participate in such a surveillance programme was high as they are eager to know the cause(s)  
496 of abortions. Despite this, reporting may only be sustained if reported calls result in follow-up  
497 investigations and results disseminated to the farmers. This being a cross sectional study, it is  
498 not possible to infer a causal association between RVF and abortions but our estimates of  
499 seroprevalence are similar to those in neighbouring countries like Kenya where RVF is  
500 endemic.

## 501 **Acknowledgments**

502 First, we acknowledge technical guidance and permission to conduct this study from Dr. Anna  
503 Rose Ademun, the commissioner Animal Health – MAAIF. We are grateful for funding for  
504 this fieldwork from Biotechnology and Biological Sciences Research Council (BBSRC)  
505 Impact Acceleration Account award, Public Engagement Starter Grant, Nigeria Travel Grant  
506 from University of Cambridge Centre for African Studies. AJKC and JLNW were supported  
507 by The Alborada Trust. AWW was supported by Cambridge Trust for his doctoral studies at  
508 University of Cambridge, United Kingdom. Furthermore, special appreciation to CEHA for  
509 administrative support during this fieldwork in Uganda.

510 We acknowledge Dr Robert Ofwete and Micheal Wambi for their support in spatial  
511 visualization of Fig 1 and 2 respectively. We acknowledge the farmers whom we worked  
512 closely during the establishment of this pilot project in Isingiro District, Uganda. The technical  
513 guidance during initial stages of conceptualization of this idea from Drs Jennifer Lord and  
514 Joshua Longbottom are highly appreciated. The incredible grateful support from Ministry of  
515 Agriculture, Animal Industries and Fisheries and Isingiro District Local Government for my  
516 fieldwork in Uganda. Specifically, Isingiro staff including Dr Bruhan Kasozi (District  
517 Veterinary Officer), Dr Edson Tumusherure (District Health Officer), Marion Alowo, Pius  
518 Manigaruhanga, entire district health team and veterinary staff. MAAIF staff; Dr Dan  
519 Tumusiime (Senior Veterinary Officer), Dr Ben Ssenkera (Senior Veterinary Officer), Dr  
520 Robert Mwebe (Principal Veterinary Officer), Mr Olympia Mugarura and Mr Milton Bahati,  
521 both laboratory technologists. Lastly, we appreciate the contribution of different research  
522 assistants led by Mellon Ainembabazi and Noel Emma Esutu.

523

## 524 **Ethical Considerations**

525 This study is part of the corresponding authors PhD project. We sought and received ethical  
526 approval to conduct the research from Makerere University School of Public Health (Reference  
527 No: *SPH-2022-364*), Uganda National Council of Science and Technology (UNCST)  
528 (Reference No: *A264ES*), and Human Biology Research Ethics Committee, University of  
529 Cambridge, United Kingdom (Reference No: *HBREC.2023.02*). Lastly, we sought  
530 administrative clearance from Isingiro district local governments' administration specifically  
531 from the Chief Administrative Officer's office (dated *20<sup>th</sup> March 2023*) for this study to be  
532 conducted.

533 Written informed consent from the research participants (Farmers/livestock owners) was  
534 obtained for free and voluntary participation in the study. This was after understanding the  
535 purpose and costs of the study. During the blood and vaginal swab collection, we also sought  
536 written consent for photographing of the animals for potential detection of RVF and follow-up  
537 for actions in future. These photos were only for identification of the animals should the vaginal  
538 swabs turn positive for RVF for control strategies by Isingiro district Veterinary department or  
539 MAAIF. To enhance understanding, we translated all the data collection tools and informed  
540 consent into the local language (Runyankole) which was the most spoken language in the  
541 Isingiro district. This will ease the understanding of the entire project for the participants to  
542 consent. We further kept the information confidential by keeping identifying information  
543 (telephone numbers) under key and lock but also coded. The data was analysed and published  
544 in aggregate form to avoid identification of individual participants. The data is currently stored  
545 under key and lock for the five years after publication as stipulated by UNCST.

## 546 **Author Contributions**

547 AWW, AJKC and JLNW conceptualized the study, developed protocols and analysed the data.  
548 AJKC mobilized funds to implement this pilot study, LM supervised AWW during his  
549 fieldwork in Uganda. EH, ARA and SAA gave technical guidance to AWW during fieldwork  
550 in Isingiro district and laboratory analysis at NADDEC. AWW and AJKC drafted the first  
551 version of the manuscript. EH, LM, SAA, ARA and JLNW reviewed and gave technical input  
552 to the manuscript. All authors approved the final version of the manuscript.

553

554

555

556 **References**

- 557
- 558 Aceng, F.L., Kayiwa, J., Elyanu, P., Ojwang, J., Nyakarahuka, L., Balinandi, S., Byakika-
- 559 Tusiime, J., Wejuli, A., Harris, J.R., Opolot, J., 2023. Rift valley fever outbreak in
- 560 Sembabule District, Uganda, December 2020. *One Health Outlook* 5, 16.
- 561 <https://doi.org/10.1186/s42522-023-00092-3>
- 562 Adonia, B.K.K., 2013. The cost of poor land use practices in Lake Nakivale Wetland in Isingiro
- 563 District, Uganda. *African Journal of Environmental Science and Technology* 7, 448–
- 564 456. <https://doi.org/10.5897/AJEST2013.1490>
- 565 Ahmed, H., Yoder, J., de Glanville, W.A., Davis, A., Kibona, T.J., Mmbaga, B.T., Lankester,
- 566 F., Swai, E.S., Cleaveland, S., 2019. Economic burden of livestock disease and drought
- 567 in Northern Tanzania. *Journal of Development and Agricultural Economics* 11, 140–
- 568 151. <https://doi.org/10.5897/JDAE2018.1028>
- 569 Akwongo, C.J., Kakooza, S., 2022. Exposure to *Brucella* spp. in Goats and Sheep in Karenga
- 570 District, Uganda Diagnosed by Modified Rose Bengal Method. *Zoonotic Diseases* 2,
- 571 163–171. <https://doi.org/10.3390/zoonoticdis2030015>
- 572 Animal Diseases [WWW Document], n.d. . WOAHP - World Organisation for Animal Health.
- 573 URL [https://www.woah.org/en/what-we-do/animal-health-and-welfare/animal-](https://www.woah.org/en/what-we-do/animal-health-and-welfare/animal-diseases/)
- 574 [diseases/](https://www.woah.org/en/what-we-do/animal-health-and-welfare/animal-diseases/) (accessed 2.2.24).
- 575 Anywaine, Z., Lule, S.A., Hansen, C., Warimwe, G., Elliott, A., 2022. Clinical manifestations
- 576 of Rift Valley fever in humans: Systematic review and meta-analysis. *PLOS Neglected*
- 577 *Tropical Diseases* 16, e0010233. <https://doi.org/10.1371/journal.pntd.0010233>
- 578 Ario, A.R., Makumbi, I., Kadobera, D., Bulage, L., Ocom, F., Kwesiga, B., Jarvis, D.F.,
- 579 Nabatanzi, S., Homby, J., Banage, F., Brown, V., Harris, J.R., Boore, A.L., Nelson, L.J.,
- 580 Binder, S., Mwebesa, H.G., Aceng, J.R., 2022. Uganda National Institute of Public
- 581 Health: Establishment and Experiences, 2013–2021. *Global Health: Science and*
- 582 *Practice* 10. <https://doi.org/10.9745/GHSP-D-21-00784>
- 583 Aruho, R., MacLeod, E.T., Manirakiza, L., Rwego, I.B., 2021. A serological survey of
- 584 brucellosis in wildlife in four major National Parks of Uganda. *BMC Vet Res* 17, 95.
- 585 <https://doi.org/10.1186/s12917-021-02782-4>
- 586 Bailey, J.M.M., Charles L., 1988. RIFT Valley Fever, in: *The Arboviruses*. CRC Press.
- 587 Bett, B., Lindahl, J., Sang, R., Wainaina, M., Kairu-Wanyoike, S., Bukachi, S., Njeru, I.,
- 588 Karanja, J., Ontiri, E., Njenga, M.K., Wright, D., Warimwe, G.M., Grace, D., 2019.
- 589 Association between Rift Valley fever virus seroprevalences in livestock and humans

- 590 and their respective intra-cluster correlation coefficients, Tana River County, Kenya.  
591 *Epidemiology & Infection* 147, e67. <https://doi.org/10.1017/S0950268818003242>
- 592 Bird, B.H., Ksiazek, T.G., Nichol, S.T., MacLachlan, N.J., 2009. Rift Valley fever virus. *Javma*  
593 234, 883–893. <https://doi.org/10.2460/javma.234.7.883>
- 594 Birungi, D., Aceng, F.L., Bulage, L., Nkonwa, I.H., Mirembe, B.B., Biribawa, C.,  
595 Okethwangu, D., Opio, N.D., Monje, F., Muwanguzi, D., Ndumu, D.B., Aruho, R.,  
596 Lumu, P., Lutwama, J., Kwesiga, B., Ario, A.R., 2021. Sporadic Rift Valley Fever  
597 Outbreaks in Humans and Animals in Uganda, October 2017–January 2018. *Journal of*  
598 *Environmental and Public Health* 2021, e8881191.  
599 <https://doi.org/10.1155/2021/8881191>
- 600 Budasha, N.H., Gonzalez, J.-P., Sebhatu, T.T., Arnold, E., 2018. Rift Valley fever  
601 seroprevalence and abortion frequency among livestock of Kisoro district, South  
602 Western Uganda (2016): a prerequisite for zoonotic infection. *BMC Veterinary*  
603 *Research* 14, 271. <https://doi.org/10.1186/s12917-018-1596-8>
- 604 Bugeza, J., Roesel, K., Moriyon, I., Mugizi, D., Alinaitwe, L., Kivali, V., Kankya, C., Cook,  
605 E.A.J., 2023. Sero-prevalence and factors associated with anti-Brucella antibodies in  
606 slaughter livestock in Uganda. *Front. Epidemiol.* 3.  
607 <https://doi.org/10.3389/fepid.2023.1213592>
- 608 Buregyeya, E., Atusingwize, E., Nsamba, P., Musoke, D., Naigaga, I., Kabasa, J.D., Amuguni,  
609 H., Bazeyo, W., 2020. Operationalizing the One Health Approach in Uganda:  
610 Challenges and Opportunities. *J Epidemiol Glob Health* 10, 250–257.  
611 <https://doi.org/10.2991/jegh.k.200825.001>
- 612 Bwengye, E., Nagawa, G.M., Tumwesigye, W., 2023. Diversity of the On-Farm Crop Dry  
613 Spell Adaptation Technologies in Isingiro Town Council, Isingiro District, Uganda.  
614 *African Journal of Climate Change and Resource Sustainability* 2, 102–116.  
615 <https://doi.org/10.37284/ajccrs.2.1.1275>
- 616 Clark, M.H.A., Warimwe, G.M., Nardo, A.D., Lyons, N.A., Gubbins, S., 2018. Systematic  
617 literature review of Rift Valley fever virus seroprevalence in livestock, wildlife and  
618 humans in Africa from 1968 to 2016. *PLOS Neglected Tropical Diseases* 12, e0006627.  
619 <https://doi.org/10.1371/journal.pntd.0006627>
- 620 de Glanville, W.A., Allan, K.J., Nyarobi, J.M., Thomas, K.M., Lankester, F., Kibona, T.J.,  
621 Claxton, J.R., Brennan, B., Carter, R.W., Crump, J.A., Halliday, J.E.B., Ladbury, G.,  
622 Mmbaga, B.T., Mramba, F., Nyasebwa, O.M., Rubach, M.P., Rostal, M.K., Sanka, P.,  
623 Swai, E.S., Szemiel, A.M., Willett, B.J., Cleaveland, S., 2022. An outbreak of Rift

- 624 Valley fever among peri-urban dairy cattle in northern Tanzania. *Transactions of The*  
625 *Royal Society of Tropical Medicine and Hygiene* 116, 1082–1090.  
626 <https://doi.org/10.1093/trstmh/trac076>
- 627 Dick, G.W.A., 1953. Paper: Epidemiological notes on some viruses isolated in Uganda (Yellow  
628 fever, Rift Valley fever, Bwamba fever, West Nile, Mengo, Semliki forest,  
629 Bunyamwera, Ntaya, Uganda S and Zika viruses). *Transactions of the Royal Society of*  
630 *Tropical Medicine and Hygiene* 47, 13–48. [https://doi.org/10.1016/0035-](https://doi.org/10.1016/0035-9203(53)90021-2)  
631 [9203\(53\)90021-2](https://doi.org/10.1016/0035-9203(53)90021-2)
- 632 Domfe, T., Njengele-Tetyana, Z., Mhlanga, N., Tetyana, P., Skepu, A., Ngila, J.C.,  
633 Sikhwivhilu, L.M., 2022. Development of a Versatile Half-Strip Lateral Flow Assay  
634 toward the Detection of Rift Valley Fever Virus Antibodies. *Diagnostics* 12, 2664.  
635 <https://doi.org/10.3390/diagnostics12112664>
- 636 Ebogo-Belobo, J.T., Kenmoe, S., Abanda, N.N., Bowo-Ngandji, A., Mbagu, D.S., Magoudjou-  
637 Pekam, J.N., Kame-Ngasse, G.I., Tchatchouang, S., Menkem, E.Z., Okobalemba, E.A.,  
638 Noura, E.A., Meta-Djoms, D., Maïdadi-Foudi, M., Kenfack-Zanguim, J., Kenfack-  
639 Momo, R., Kengne-Nde, C., Esemu, S.N., Mbacham, W.F., Sadeuh-Mba, S.A., Ndip,  
640 L., Njouom, R., 2023. Contemporary epidemiological data of Rift Valley fever virus in  
641 humans, mosquitoes and other animal species in Africa: A systematic review and meta-  
642 analysis. *Veterinary Medicine and Science* 9, 2309–2328.  
643 <https://doi.org/10.1002/vms3.1238>
- 644 Gachohi, J., Njoki, P., Mogoa, E., Otieno, F., Muturi, M., Mwatondo, A., Ngere, I., Dawa, J.,  
645 Nasimiyu, C., Osoro, E., Bett, B., Njenga, K., 2024. Higher livestock abortion burden  
646 in arid and semi-arid lands, Kenya, 2019–2020. *PLOS ONE* 19, e0297274.  
647 <https://doi.org/10.1371/journal.pone.0297274>
- 648 Gerdes, G.H., 2004. Rift Valley fever. *Rev Sci Tech* 23, 613–623.  
649 <https://doi.org/10.20506/rst.23.2.1500>
- 650 Glanville, W.A. de, Nyarobi, J.M., Kibona, T., Halliday, J.E.B., Thomas, K.M., Allan, K.J.,  
651 Johnson, P.C.D., Davis, A., Lankester, F., Claxton, J.R., Rostal, M.K., Carter, R.W.,  
652 Jong, R.M.F. de, Rubach, M.P., Crump, J.A., Mmbaga, B.T., Nyasebwa, O.M., Swai,  
653 E.S., Willett, B., Cleaveland, S., 2022. Inter-epidemic Rift Valley fever virus infection  
654 incidence and risks for zoonotic spillover in northern Tanzania. *PLOS Neglected*  
655 *Tropical Diseases* 16, e0010871. <https://doi.org/10.1371/journal.pntd.0010871>
- 656 González-Gordon, L., Porphyre, T., Muwonge, A., Nantima, N., Ademun, R., Ochwo, S.,  
657 Mwiine, N.F., Boden, L., Muhanguzi, D., Bronsvort, B.M. de C., 2023. Identifying

- 658 target areas for risk-based surveillance and control of transboundary animal diseases: a  
659 seasonal analysis of slaughter and live-trade cattle movements in Uganda. *Sci Rep* 13,  
660 18619. <https://doi.org/10.1038/s41598-023-44518-4>
- 661 Hadley Wickham, n.d. *ggplot2: Elegant Graphics for Data Analysis*. Springer-Verlag New  
662 York.
- 663 Hadley Wickham and Mara Averick and Jennifer Bryan and Winston Chang and Lucy  
664 D'Agostino McGowan and Romain François and Garrett Grolemund and Alex Hayes  
665 and Lionel Henry and Jim Hester and Max Kuhn and Thomas Lin Pedersen and Evan  
666 Miller and Stephan Milton Bache and Kirill Müller and Jeroen Ooms and David  
667 Robinson and Dana Paige Seidel and Vitalie Spinu and Kohske Takahashi and Davis  
668 Vaughan and Claus Wilke and Kara Woo and Hiroaki Yutani, n.d. Welcome to the  
669 {tidyverse}.
- 670 Hartman, A., 2017. Rift Valley Fever. *Clinics in laboratory medicine* 37, 285.  
671 <https://doi.org/10.1016/j.cll.2017.01.004>
- 672 Hasahya, E., Thakur, K., Dione, M.M., Kerfua, S.D., Mugezi, I., Lee, H.S., 2023. Analysis of  
673 patterns of livestock movements in the Cattle Corridor of Uganda for risk-based  
674 surveillance of infectious diseases. *Frontiers in Veterinary Science* 10.
- 675 Hassan, A., Muturi, M., Mwatondo, A., Omolo, J., Bett, B., Gikundi, S., Konongoi, L., Ofula,  
676 V., Makayotto, L., Kasiti, J., Oele, E., Onyango, C., Gura, Z., Njenga, K., Munyua, P.,  
677 2020. Epidemiological Investigation of a Rift Valley Fever Outbreak in Humans and  
678 Livestock in Kenya, 2018. *Am J Trop Med Hyg* 103, 1649–1655.  
679 <https://doi.org/10.4269/ajtmh.20-0387>
- 680 J, W.L., J, and A.S.E.W.L., E, and A.S., 2023. SOLVING THE ELECTRICITY ACCESS  
681 DILEMMA IN RURAL UGANDA: A CASE STUDY OF SANGA SUB COUNTY  
682 AND SANGA TOWN COUNCIL. *Top Academic Journal of Environmental and*  
683 *Agricultural Sciences* 1, 9–22.
- 684 Jeanmaire, E.M., Rabenarivahiny, R., Biarmann, M., Rabibisoa, L., Ravaomanana, F.,  
685 Randriamparany, T., Fy Andriamandimby, S., Diaw, C.S., Fenzara, P., de La Rocque,  
686 S., Reynes, J.-M., 2011. Prevalence of Rift Valley Fever Infection in Ruminants in  
687 Madagascar After the 2008 Outbreak. *Vector-Borne and Zoonotic Diseases* 11, 395–  
688 402. <https://doi.org/10.1089/vbz.2009.0249>
- 689 Jenkin, D., Wright, D., Folegatti, P.M., Platt, A., Poulton, I., Lawrie, A., Tran, N., Boyd, A.,  
690 Turner, C., Gitonga, J.N., Karanja, H.K., Mugo, D., Ewer, K.J., Bowden, T.A., Gilbert,  
691 S.C., Charleston, B., Kaleebu, P., Hill, A.V.S., Warimwe, G.M., 2023. Safety and



- 692 immunogenicity of a ChAdOx1 vaccine against Rift Valley fever in UK adults: an  
693 open-label, non-randomised, first-in-human phase 1 clinical trial. *The Lancet Infectious*  
694 *Diseases* 23, 956–964. [https://doi.org/10.1016/S1473-3099\(23\)00068-3](https://doi.org/10.1016/S1473-3099(23)00068-3)
- 695 Kabami, Z., 2023. Notes from the Field: Rift Valley Fever Outbreak — Mbarara District,  
696 Western Uganda, January–March 2023. *MMWR Morb Mortal Wkly Rep* 72.  
697 <https://doi.org/10.15585/mmwr.mm7223a6>
- 698 Katana, E., Ndyabakira, A., Migisha, R., Gonahasa, D.N., Amana, G., Byaruhanga, A.,  
699 Chebrot, I., Oundo, C., Kadobera, D., Bulage, L., Ario, A.R., Okello, D.A., Harris, J.R.,  
700 2024. Use of a toll-free call center for COVID-19 response and continuity of essential  
701 services during the lockdown, Greater Kampala, Uganda, 2020: a descriptive study.  
702 *The Pan African Medical Journal* 47.  
703 <https://doi.org/10.11604/pamj.2024.47.141.36203>
- 704 Kaur, A., Kumar, R., Sharma, A., 2023. Rift Valley Fever in Livestock Wildlife and Humans:  
705 A Review. *Journal of Zoonotic Diseases* 7, 325–332.  
706 <https://doi.org/10.22034/jzd.2023.16766>
- 707 Kiggundu, T., 2022. Notes from the Field: Outbreak of Ebola Virus Disease Caused by Sudan  
708 ebolavirus — Uganda, August–October 2022. *MMWR Morb Mortal Wkly Rep* 71.  
709 <https://doi.org/10.15585/mmwr.mm7145a5>
- 710 Kim, Y., Métras, R., Dommergues, L., Youssouffi, C., Combo, S., Godais, G.L., Pfeiffer, D.U.,  
711 Cêtre-Sossah, C., Cardinale, E., Filleul, L., Youssouf, H., Subiros, M., Fournié, G.,  
712 2021. The role of livestock movements in the spread of Rift Valley fever virus in  
713 animals and humans in Mayotte, 2018–19. *PLOS Neglected Tropical Diseases* 15,  
714 e0009202. <https://doi.org/10.1371/journal.pntd.0009202>
- 715 Kiyaga, C., Sendagire, H., Joseph, E., McConnell, I., Grosz, J., Narayan, V., Esiru, G., Elyanu,  
716 P., Akol, Z., Kirungi, W., Musinguzi, J., Opio, A., 2013. Uganda’s New National  
717 Laboratory Sample Transport System: A Successful Model for Improving Access to  
718 Diagnostic Services for Early Infant HIV Diagnosis and Other Programs. *PLOS ONE*  
719 8, e78609. <https://doi.org/10.1371/journal.pone.0078609>
- 720 Kweyu, R.M., Asokan, S.M., Ndesanjo, R.B., Obando, J.A., Tumbo, M.H., 2023. Climate  
721 Governance in Eastern Africa: The Challenges and Prospects of Climate Change  
722 Adaptation Policies, in: Onyango, G. (Ed.), *State Politics and Public Policy in Eastern*  
723 *Africa: A Comparative Perspective*. Springer International Publishing, Cham, pp. 347–  
724 369. [https://doi.org/10.1007/978-3-031-13490-6\\_16](https://doi.org/10.1007/978-3-031-13490-6_16)

- 725 Lakshminarasimhappa, M.C., 2022. Web-Based and Smart Mobile App for Data Collection:  
726 Kobo Toolbox / Kobo Collect. *Journal of Indian Library Association* 57, 72–79.
- 727 Lo, K., Kibalya, B., 2023. Electric cooperatives and the political economy of rural  
728 electrification in Africa: Insights from Uganda. *The Electricity Journal* 36, 107238.  
729 <https://doi.org/10.1016/j.tej.2023.107238>
- 730 Lokamar, P.N., Kutwah, M.A., Atieli, H., Gumo, S., Ouma, C., 2020. Socio-economic impacts  
731 of brucellosis on livestock production and reproduction performance in Koibatek and  
732 Marigat regions, Baringo County, Kenya. *BMC Veterinary Research* 16, 61.  
733 <https://doi.org/10.1186/s12917-020-02283-w>
- 734 Matsiela, M.S., Naicker, L., Khoza, T., Mokoena, N., 2023. Safety and immunogenicity of  
735 inactivated Rift Valley Fever Smithburn viral vaccine in sheep. *Virology* 20, 221.  
736 <https://doi.org/10.1186/s12985-023-02180-2>
- 737 Monje, F., Kadobera, D., Ndumu, D.B., Bulage, L., Ario, A.R., 2021. Trends and spatial  
738 distribution of animal bites and vaccination status among victims and the animal  
739 population, Uganda: A veterinary surveillance system analysis, 2013-2017. *PLoS Negl  
740 Trop Dis* 15, e0007944. <https://doi.org/10.1371/journal.pntd.0007944>
- 741 Mubiru, S., Marshall, K., Lukuyu, B.A., Oba, P., Ahumuza, R., Ouma, E.A., 2023. Beef value  
742 chain situation analysis for Uganda. ILRI.
- 743 Muema, C., Ngarega, B.K., Muturi, E., Wei, H., Yang, H., 2021. Present and Future Ecological  
744 Niche Modeling of Rift Valley fever in East Africa in Response to Climate Change.  
745 <https://doi.org/10.1101/2021.03.03.433832>
- 746 Muma, J.B., Samui, K.L., Siamudaala, V.M., Oloya, J., Matope, G., Omer, M.K., Munyeme,  
747 M., Mubita, C., Skjerve, E., 2006. Prevalence of antibodies to *Brucella* spp. and  
748 individual risk Factors of Infection in Traditional Cattle, Goats and Sheep Reared in  
749 Livestock–Wildlife Interface Areas of Zambia. *Trop Anim Health Prod* 38, 195–206.  
750 <https://doi.org/10.1007/s11250-006-4320-9>
- 751 Muturi, M., Mwatondo, A., Nijhof, A.M., Akoko, J., Nyamota, R., Makori, A., Nyamai, M.,  
752 Nthiwa, D., Wambua, L., Roesel, K., Thumbi, S.M., Bett, B., 2023. Ecological and  
753 subject-level drivers of interepidemic Rift Valley fever virus exposure in humans and  
754 livestock in Northern Kenya. *Sci Rep* 13, 15342. <https://doi.org/10.1038/s41598-023-42596-y>
- 755
- 756 Nagasha, J.I., Mugisha, L., Kaase-Bwanga, E., Onyuth, H., Ocaido, M., 2019. Effect of climate  
757 change on gender roles among communities surrounding Lake Mburo National Park,  
758 Uganda. *Emerald Open Research* 1. <https://doi.org/10.1108/EOR-06-2023-0002>

- 759 Nanyingi, M.O., Muchemi, G.M., Thumbi, S.M., Ade, F., Onyango, C.O., Kiama, S.G., Bett,  
760 B., 2017. Seroepidemiological Survey of Rift Valley Fever Virus in Ruminants in  
761 Garissa, Kenya. *Vector-Borne and Zoonotic Diseases* 17, 141–146.  
762 <https://doi.org/10.1089/vbz.2016.1988>
- 763 Nanyingi, M.O., Munyua, P., Kiama, S.G., Muchemi, G.M., Thumbi, S.M., Bitek, A.O., Bett,  
764 B., Muriithi, R.M., Njenga, M.K., 2015. A systematic review of Rift Valley Fever  
765 epidemiology 1931–2014. *Infection Ecology & Epidemiology* 5, 28024.  
766 <https://doi.org/10.3402/iee.v5.28024>
- 767 Ndumu, D.B., Bakamutumaho, B., Miller, E., Nakayima, J., Downing, R., Balinandi, S.,  
768 Monje, F., Tumusiime, D., Nanfuka, M., Meunier, N., Arinaitwe, E., Rutebarika, C.,  
769 Kidega, E., Kyondo, J., Ademun, R., Njenga, K.M., Veas, F., Gonzalez, J.-P., 2021.  
770 Serological evidence of Rift Valley fever virus infection among domestic ruminant  
771 herds in Uganda. *BMC Veterinary Research* 17, 157. [https://doi.org/10.1186/s12917-](https://doi.org/10.1186/s12917-021-02867-0)  
772 [021-02867-0](https://doi.org/10.1186/s12917-021-02867-0)
- 773 Njenga, M.K., Kemunto, N., Kahariri, S., Holmstrom, L., Oyas, H., Biggers, K., Riddle, A.,  
774 Gachohi, J., Muturi, M., Mwatondo, A., Gakuya, F., Lekolool, I., Sitawa, R., Apamaku,  
775 M., Osoro, E., Widdowson, M.-A., Munyua, P., 2021. High real-time reporting of  
776 domestic and wild animal diseases following rollout of mobile phone reporting system  
777 in Kenya. *PLOS ONE* 16, e0244119. <https://doi.org/10.1371/journal.pone.0244119>
- 778 Nyakarahuka, L., Kyondo, J., Telford, C., Whitesell, A., Tumusiime, A., Mulei, S., Baluku, J.,  
779 Cossaboom, C.M., Cannon, D.L., Montgomery, J.M., Lutwama, J.J., Nichol, S.T.,  
780 Balinandi, S., Klena, J.D., Shoemaker, T.R., 2023a. A Countrywide  
781 Seroepidemiological Survey of Rift Valley Fever in Livestock, Uganda, 2017. *Am J*  
782 *Trop Med Hyg* 109, 548–553. <https://doi.org/10.4269/ajtmh.22-0504>
- 783 Nyakarahuka, L., Kyondo, J., Telford, C., Whitesell, A., Tumusiime, A., Mulei, S., Baluku, J.,  
784 Cossaboom, C.M., Cannon, D.L., Montgomery, J.M., Lutwama, J.J., Nichol, S.T.,  
785 Balinandi, S., Klena, J.D., Shoemaker, T.R., 2023b. A Countrywide  
786 Seroepidemiological Survey of Rift Valley Fever in Livestock, Uganda, 2017. *Am J*  
787 *Trop Med Hyg* 109, 548–553. <https://doi.org/10.4269/ajtmh.22-0504>
- 788 Nyakarahuka, L., Maurice, A. de S., Purpura, L., Ervin, E., Balinandi, S., Tumusiime, A.,  
789 Kyondo, J., Mulei, S., Tusiime, P., Lutwama, J., Klena, J.D., Brown, S., Knust, B.,  
790 Rollin, P.E., Nichol, S.T., Shoemaker, T.R., 2018a. Prevalence and risk factors of Rift  
791 Valley fever in humans and animals from Kabale district in Southwestern Uganda,

- 792 2016. PLOS Neglected Tropical Diseases 12, e0006412.  
793 <https://doi.org/10.1371/journal.pntd.0006412>
- 794 Nyakarahuka, L., Maurice, A. de S., Purpura, L., Ervin, E., Balinandi, S., Tumusiime, A.,  
795 Kyondo, J., Mulei, S., Tusiime, P., Lutwama, J., Klena, J.D., Brown, S., Knust, B.,  
796 Rollin, P.E., Nichol, S.T., Shoemaker, T.R., 2018b. Prevalence and risk factors of Rift  
797 Valley fever in humans and animals from Kabale district in Southwestern Uganda,  
798 2016. PLOS Neglected Tropical Diseases 12, e0006412.  
799 <https://doi.org/10.1371/journal.pntd.0006412>
- 800 Nyakarahuka, L., Whitmer, S., Klena, J., Balinandi, S., Talundzic, E., Tumusiime, A., Kyondo,  
801 J., Mulei, S., Patel, K., Baluku, J., Akurut, G., Namanya, D., Kamugisha, K.,  
802 Cossaboom, C., Whitesell, A., Telford, C., Graziano, J., Montgomery, J., Nichol, S.,  
803 Lutwama, J., Shoemaker, T., 2023c. Detection of Sporadic Outbreaks of Rift Valley  
804 Fever in Uganda through the National Viral Hemorrhagic Fever Surveillance System,  
805 2017–2020. *Am J Trop Med Hyg* 108, 995–1002. [https://doi.org/10.4269/ajtmh.22-](https://doi.org/10.4269/ajtmh.22-0410)  
806 0410
- 807 Nyamota, R., Maina, J., Akoko, J., Nthiwa, D., Mwatondo, A., Muturi, M., Wambua, L.,  
808 Middlebrook, E.A., Bartlow, A.W., Fair, J.M., Bett, B., 2023. Seroprevalence of  
809 *Brucella* spp. and Rift Valley fever virus among slaughterhouse workers in Isiolo  
810 County, northern Kenya. *PLOS Neglected Tropical Diseases* 17, e0011677.  
811 <https://doi.org/10.1371/journal.pntd.0011677>
- 812 Owange, N.O., Ogara, W.O., Affognon, H., Peter, G.B., Kasiiti, J., Okuthe, S., Onyango-  
813 Ouma, W., Landmann, T., Sang, R., Mbabu, M., 2014a. Occurrence of rift valley fever  
814 in cattle in Ijara district, Kenya. *Preventive Veterinary Medicine* 117, 121–128.  
815 <https://doi.org/10.1016/j.prevetmed.2014.08.008>
- 816 Owange, N.O., Ogara, W.O., Affognon, H., Peter, G.B., Kasiiti, J., Okuthe, S., Onyango-  
817 Ouma, W., Landmann, T., Sang, R., Mbabu, M., 2014b. Occurrence of rift valley fever  
818 in cattle in Ijara district, Kenya. *Preventive Veterinary Medicine* 117, 121–128.  
819 <https://doi.org/10.1016/j.prevetmed.2014.08.008>
- 820 Oymans, J., Schreur, P.J.W., Keulen, L. van, Kant, J., Kortekaas, J., 2020. Rift Valley fever  
821 virus targets the maternal-foetal interface in ovine and human placentas. *PLOS*  
822 *Neglected Tropical Diseases* 14, e0007898.  
823 <https://doi.org/10.1371/journal.pntd.0007898>
- 824 Payne, A., Ogweng, P., Ståhl, K., Masembe, C., Jori, F., 2021. Spatial-Temporal Movements  
825 of Free Ranging Pigs at the Wildlife-Livestock Interface of Murchison Falls National

- 826 Park, Uganda: Potential of Disease Control at a Local Scale. *Front. Vet. Sci.* 8.  
827 <https://doi.org/10.3389/fvets.2021.689377>
- 828 Petrova, V., Kristiansen, P., Norheim, G., Yimer, S.A., 2020. Rift valley fever: diagnostic  
829 challenges and investment needs for vaccine development. *BMJ Global Health* 5,  
830 e002694. <https://doi.org/10.1136/bmjgh-2020-002694>
- 831 Qiu, Y., Guitian, J., Webster, J.P., Musallam, I., Haider, N., Drewe, J.A., Song, J., 2023. Global  
832 prioritization of endemic zoonotic diseases for conducting surveillance in domestic  
833 animals to protect public health. *Philosophical Transactions of the Royal Society B:*  
834 *Biological Sciences* 378, 20220407. <https://doi.org/10.1098/rstb.2022.0407>
- 835 R Core Team (2023)., n.d. R: A Language and Environment for Statistical Computing\_. R  
836 Foundation for Statistical Computing, Vienna, Austria. <<https://www.R-project.org/>>.
- 837 Sasaya, T., Palacios, G., Briese, T., Di Serio, F., Groschup, M.H., Neriya, Y., Song, J.-W.,  
838 Tomitaka, Y., 2023. ICTV Virus Taxonomy Profile: Phenuiviridae 2023. *Journal of*  
839 *General Virology* 104, 001893. <https://doi.org/10.1099/jgv.0.001893>
- 840 Sekamatte, M., Krishnasamy, V., Bulage, L., Kihembo, C., Nantima, N., Monje, F., Ndumu,  
841 D., Sentumbwe, J., Mbolanyi, B., Aruho, R., Kaboyo, W., Mutonga, D., Basler, C.,  
842 Paige, S., Behravesh, C.B., 2018. Multisectoral prioritization of zoonotic diseases in  
843 Uganda, 2017: A One Health perspective. *PLOS ONE* 13, e0196799.  
844 <https://doi.org/10.1371/journal.pone.0196799>
- 845 Seroprevalence and Associated Risk Factors of Rift Valley Fever in Domestic Small  
846 Ruminants in the North Region of Cameroon [WWW Document], n.d. URL  
847 <https://www.hindawi.com/journals/vmi/2019/8149897/> (accessed 4.22.24).
- 848 Shoemaker, T.R., Nyakarahuka, L., Balinandi, S., Ojwang, J., Tumusiime, A., Mulei, S.,  
849 Kyondo, J., Lubwama, B., Sekamatte, M., Namutebi, A., Tusiime, P., Monje, F.,  
850 Mayanja, M., Ssendagire, S., Dahlke, M., Kyazze, S., Wetaka, M., Makumbi, I.,  
851 Borchert, J., Zufan, S., Patel, K., Whitmer, S., Brown, S., Davis, W.G., Klena, J.D.,  
852 Nichol, S.T., Rollin, P.E., Lutwama, J., 2019. First Laboratory-Confirmed Outbreak of  
853 Human and Animal Rift Valley Fever Virus in Uganda in 48 Years. *Am J Trop Med*  
854 *Hyg* 100, 659–671. <https://doi.org/10.4269/ajtmh.18-0732>
- 855 Signorell A (2023), n.d. DescTools: Tools for Descriptive Statistics.  
856 [sub-handbook.pdf](#), n.d.
- 857 Taremwa, I.M., Ashaba, S., Ayebazibwe, C., Kemeza, I., Adrama, H.O., Omoding, D., Yatuha,  
858 J., Hilliard, R., 2020. Mind the gap: scaling up the utilization of insecticide treated  
859 mosquito nets using a knowledge translation model in Isingiro district, rural south

860 western Uganda. *Health Psychology and Behavioral Medicine* 8, 383–397.  
861 <https://doi.org/10.1080/21642850.2020.1814782>

862 Thumbi, S.M., Njenga, M.K., Otiang, E., Otieno, L., Munyua, P., Eichler, S., Widdowson, M.-  
863 A., McElwain, T.F., Palmer, G.H., 2019. Mobile phone-based surveillance for animal  
864 disease in rural communities: implications for detection of zoonoses spillover.  
865 *Philosophical Transactions of the Royal Society B: Biological Sciences* 374, 20190020.  
866 <https://doi.org/10.1098/rstb.2019.0020>

867 Tigoi, C., Sang, R., Chepkorir, E., Orindi, B., Arum, S.O., Mulwa, F., Mosomtai, G., Limbaso,  
868 S., Hassan, O.A., Irura, Z., Ahlm, C., Evander, M., 2020. High risk for human exposure  
869 to Rift Valley fever virus in communities living along livestock movement routes: A  
870 cross-sectional survey in Kenya. *PLOS Neglected Tropical Diseases* 14, e0007979.  
871 <https://doi.org/10.1371/journal.pntd.0007979>

872 Tumusiime, D., Isingoma, E., Tashoroora, O.B., Ndumu, D.B., Bahati, M., Nantima, N.,  
873 Mugizi, D.R., Jost, C., Bett, B., 2023a. Mapping the risk of Rift Valley fever in Uganda  
874 using national seroprevalence data from cattle, sheep and goats. *PLOS Neglected*  
875 *Tropical Diseases* 17, e0010482. <https://doi.org/10.1371/journal.pntd.0010482>

876 Tumusiime, D., Isingoma, E., Tashoroora, O.B., Ndumu, D.B., Bahati, M., Nantima, N.,  
877 Mugizi, D.R., Jost, C., Bett, B., 2023b. Mapping the risk of Rift Valley fever in Uganda  
878 using national seroprevalence data from cattle, sheep and goats. *PLOS Neglected*  
879 *Tropical Diseases* 17, e0010482. <https://doi.org/10.1371/journal.pntd.0010482>

880 Tumusiime, D., Nijhof, A.M., Groschup, M.H., Lutwama, J., Roesel, K., Bett, B., 2023c.  
881 Participatory survey of risk factors and pathways for Rift Valley fever in pastoral and  
882 agropastoral communities of Uganda. *Preventive Veterinary Medicine* 106071.  
883 <https://doi.org/10.1016/j.prevetmed.2023.106071>

884 UBOS, 2024. NATIONAL LIVESTOCK CENSUS 2021 MAIN REPORT.

885 Walt, M. van der, Rakaki, M.E., MacIntyre, C., Mendes, A., Junglen, S., Theron, C., Anthony,  
886 T., O'Dell, N., Venter, M., 2023. Identification and Molecular Characterization of  
887 Shamonda Virus in an Aborted Goat Fetus in South Africa. *Pathogens* 12, 1100.  
888 <https://doi.org/10.3390/pathogens12091100>

889  
890  
891  
892  
893

894 **Supporting information**

895 **S1 Table: Socio-demographic characteristics of respondents**

| <b>Variable</b>                                                                                   | <b>Frequency (n)</b> | <b>Percentages (%)</b> |
|---------------------------------------------------------------------------------------------------|----------------------|------------------------|
| <b>Animal species tested for RVF</b>                                                              |                      |                        |
| Cattle                                                                                            | 106                  | 58                     |
| Goats                                                                                             | 66                   | 36                     |
| Sheep                                                                                             | 12                   | 7                      |
| <b>Animal breeds in the study area (n=52)</b>                                                     |                      |                        |
| Exotic                                                                                            | 5                    | 10                     |
| Crossbreed/hybrid                                                                                 | 25                   | 48                     |
| Locals (Ankole ( <i>Bos taurus indicus</i> ), East African shorthorn Zebu ( <i>Bos indicus</i> )) | 22                   | 42                     |
| <b>Gender of respondent</b>                                                                       |                      |                        |
| Females                                                                                           | 26                   | 14                     |
| Males                                                                                             | 158                  | 86                     |
| <b>Means of reporting to the call centre (n=52)</b>                                               |                      |                        |
| Phone Calls                                                                                       | 52                   | 100                    |
| <b>Number of livestock abortions reported (n=52)</b>                                              |                      |                        |
| Median (4.0 IQR 3.0)                                                                              |                      |                        |
| <b>Occupation of the respondent</b>                                                               |                      |                        |
| Transport cyclist                                                                                 | 2                    | 1                      |
| Teacher                                                                                           | 6                    | 3                      |
| Small scale farmers                                                                               | 5                    | 3                      |
| Herdsmen                                                                                          | 159                  | 86                     |
| Political leaders                                                                                 | 5                    | 3                      |
| Others (religious leader, soldier, business)                                                      | 4                    | 2                      |
| <b>Education level of the respondent</b>                                                          |                      |                        |
| Advanced level                                                                                    | 14                   | 8                      |
| Bachelors                                                                                         | 5                    | 3                      |
| Certificate                                                                                       | 13                   | 7                      |
| Diploma                                                                                           | 12                   | 7                      |
| No education                                                                                      | 81                   | 44                     |
| Ordinary level                                                                                    | 58                   | 32                     |
| Masters degree                                                                                    | 1                    | 0                      |
| <b>Household size</b>                                                                             |                      |                        |
| Median; 10 IQR 4.25                                                                               |                      |                        |
| <b>Animal Clinical presentations at farm level*</b>                                               |                      |                        |
| W                                                                                                 | 95                   | 52                     |
| X                                                                                                 | 29                   | 16                     |
| Y                                                                                                 | 18                   | 10                     |
| Z                                                                                                 | 24                   | 13                     |
| I don't know                                                                                      | 18                   | 10                     |
| <b>Stages of the pregnancy</b>                                                                    |                      |                        |
| Early stage ( 1-3 months)                                                                         | 73                   | 40                     |
| Middle stage (4-6 months)                                                                         | 62                   | 34                     |
| Late stage (7-9 months)                                                                           | 45                   | 24                     |

|                                                   |            |            |
|---------------------------------------------------|------------|------------|
| Not sure                                          | 4          | 2          |
| <b>Environmental Conditions around the farm**</b> |            |            |
| A                                                 | 81         | 44         |
| B                                                 | 52         | 28         |
| C                                                 | 15         | 8          |
| D                                                 | 36         | 20         |
| <b>History of animal movement</b>                 |            |            |
| No                                                | 181        | 98         |
| Yes                                               | 3          | 2          |
| <b>Reported Animal vaccination status</b>         |            |            |
| No                                                | 184        | 100        |
| <b>Total</b>                                      | <b>184</b> | <b>100</b> |

896 \*W: Sudden onset of abortion among pregnant animals, Weakness /Unsteady gait  
897 Mucopurulent nasal discharge, Profuse fetid diarrhoea, High fever. X: Any three of the above  
898 symptoms, Y: Any two of the above symptoms, Z: Any one of the above symptoms  
899 \*\* A: Bushes, Recent rainfall (less than 14 days), Heavy forests, Stagnant water. B: Only 3  
900 present; Bushes, Stagnant water, Heavy forests. C: Only two present; Bushes, Recent rainfall  
901 (less than 14 days). D: Only one present.

902  
903  
904  
905  
906  
907  
908  
909  
910  
911  
912  
913  
914  
915  
916  
917  
918  
919  
920  
921  
922  
923  
924  
925  
926  
927  
928  
929  
930  
931  
932  
933



934 **S2 Table: Period for reporting of abortion cases**

935

| <b>Variable</b>                   | <b>Before call centre establishment<br/>N = 10</b> | <b>Target period (within 14 days)<br/>N = 174</b> | <b>Total</b> |
|-----------------------------------|----------------------------------------------------|---------------------------------------------------|--------------|
| <b>Host</b>                       |                                                    |                                                   |              |
| Goats                             | 0                                                  | 66                                                | 66           |
| Cattle                            | 10                                                 | 96                                                | 106          |
| Sheep                             | 0                                                  | 12                                                | 12           |
| <b>Sub county</b>                 |                                                    |                                                   |              |
| Bugango Town council              | 6                                                  | 8                                                 | 14           |
| Endinzi                           | 0                                                  | 1                                                 | 1            |
| Endinzi Town council              | 0                                                  | 1                                                 | 1            |
| Kakamba                           | 0                                                  | 17                                                | 17           |
| Kashumba                          | 0                                                  | 40                                                | 40           |
| Kikagati                          | 0                                                  | 6                                                 | 6            |
| Mbaare                            | 4                                                  | 10                                                | 14           |
| Ngarama                           | 0                                                  | 13                                                | 13           |
| Ruborogota                        | 0                                                  | 19                                                | 19           |
| Rugaaga                           | 0                                                  | 43                                                | 43           |
| Rushasha                          | 0                                                  | 12                                                | 12           |
| Rwanjogyera                       | 0                                                  | 4                                                 | 4            |
| <b>Stage of pregnancy</b>         |                                                    |                                                   |              |
| Early stage ( 1-3 months)         | 4                                                  | 69                                                | 73           |
| Middle stage (4-6 months)         | 6                                                  | 56                                                | 62           |
| Late stage (7-9 months)           | 0                                                  | 45                                                | 45           |
| Not sure                          | 0                                                  | 4                                                 | 4            |
| <b>Environmental features</b>     |                                                    |                                                   |              |
| A                                 | 0                                                  | 81                                                | 81           |
| B                                 | 0                                                  | 52                                                | 52           |
| C                                 | 0                                                  | 15                                                | 15           |
| D                                 | 10                                                 | 26                                                | 36           |
| <b>History of animal movement</b> |                                                    |                                                   |              |
| No                                | 10                                                 | 171                                               | 181          |
| Yes                               | 0                                                  | 3                                                 | 3            |
| <b>Total</b>                      |                                                    |                                                   | <b>184</b>   |

936

937

938

939

940

941

942

943

944

945

946

947

**S3 Table: Total number of abortion cases reported at the call centre**

| Call centre Alert # | Geographical locations (subcounties) | Number of reported abortions (N) | Abortion cases investigated/ Sera samples collected (n) | Proportion sampled (%) |   |   |
|---------------------|--------------------------------------|----------------------------------|---------------------------------------------------------|------------------------|---|---|
| 1                   | Masha                                | 3                                | *                                                       |                        |   |   |
| 2                   | Masha                                | 1                                | *                                                       |                        |   |   |
| 3                   | Rwentango                            | 10                               | *                                                       |                        |   |   |
| 4                   | Ngarama                              | 21                               | 13                                                      | 57                     |   |   |
| 5                   | Ngarama                              | 2                                |                                                         |                        |   |   |
| 6                   | Kashumba                             | 4                                | 40                                                      | 66                     |   |   |
| 7                   | Kashumba                             | 3                                |                                                         |                        |   |   |
| 8                   | Kashumba                             | 1                                |                                                         |                        |   |   |
| 9                   | Kashumba                             | 30                               |                                                         |                        |   |   |
| 10                  | Kashumba                             | 3                                |                                                         |                        |   |   |
| 11                  | Kashumba                             | 5                                |                                                         |                        |   |   |
| 12                  | Kashumba                             | 4                                |                                                         |                        |   |   |
| 13                  | Kashumba                             | 8                                |                                                         |                        |   |   |
| 14                  | Kashumba                             | 3                                |                                                         |                        |   |   |
| 15                  | Bugango                              | 2                                |                                                         |                        | * |   |
| 16                  | Bugango T/C                          | 6                                | 14                                                      | 100                    |   |   |
| 17                  | Bugango T/C                          | 3                                |                                                         |                        |   |   |
| 50                  | Bugango T/C                          | 5                                |                                                         |                        |   |   |
| 18                  | Mbaare                               | 10                               | 14                                                      | 78                     |   |   |
| 19                  | Mbaare                               | 8                                |                                                         |                        |   |   |
| 20                  | Nakivale                             | 1                                | *                                                       |                        |   |   |
| 21                  | Nakivale                             | 2                                | *                                                       |                        |   |   |
| 22                  | Nakivale                             | 1                                | *                                                       |                        |   |   |
| 23                  | Nakivale                             | 2                                | *                                                       |                        |   |   |
| 24                  | Kakamba                              | 24                               | 17                                                      | 71                     |   |   |
| 25                  | Rushasha                             | 28                               | 12                                                      | 43                     |   |   |
| 26                  | Endizi T/C                           | 10                               | 1                                                       | 2                      |   |   |
| 27                  | Endizi T/C                           | 8                                |                                                         |                        |   |   |
| 28                  | Endizi T/C                           | 6                                |                                                         |                        |   |   |
| 29                  | Endizi T/C                           | 5                                |                                                         |                        |   |   |
| 30                  | Endizi T/C                           | 6                                |                                                         |                        |   |   |
| 31                  | Endizi T/C                           | 5                                |                                                         |                        |   |   |
| 32                  | Endizi T/C                           | 3                                |                                                         |                        |   |   |
| 35                  | Endizi T/C                           | 5                                |                                                         |                        |   |   |
| 36                  | Endizi T/C                           | 14                               |                                                         |                        |   |   |
| 37                  | Endizi T/C                           | 5                                |                                                         |                        |   |   |
| 38                  | Endizi T/C                           | 4                                |                                                         |                        |   |   |
| 39                  | Endizi T/C                           | 3                                |                                                         |                        |   |   |
| 40                  | Endizi Subcounty                     | 16                               |                                                         |                        | 1 | 3 |
| 41                  | Endizi Subcounty                     | 3                                |                                                         |                        |   |   |
| 42                  | Endizi Subcounty                     | 8                                |                                                         |                        |   |   |
| 43                  | Endizi Subcounty                     | 4                                |                                                         |                        |   |   |
| 44                  | Endizi Subcounty                     | 3                                |                                                         |                        |   |   |

|    |                  |            |            |    |
|----|------------------|------------|------------|----|
| 45 | Endizi Subcounty | 6          |            |    |
| 46 | Rugaga           | 9          | 43         | 72 |
| 47 | Rugaga           | 25         |            |    |
| 48 | Rugaga           | 23         |            |    |
| 49 | Rugaga           | 3          |            |    |
| 51 | Ruborogota       | 22         | 19         | 86 |
| 52 | Kikagati         | 30         | 6          | 19 |
| 53 | Kikagati         | 2          |            |    |
| 33 | Rwanjogyera      | 4          | 4          | 80 |
| 34 | Rwanjogyera      | 1          |            |    |
|    | <b>Total</b>     | <b>423</b> | <b>184</b> |    |

948 \*Lost samples due to labelling loss during transportation to the national laboratory

949

950

951

952

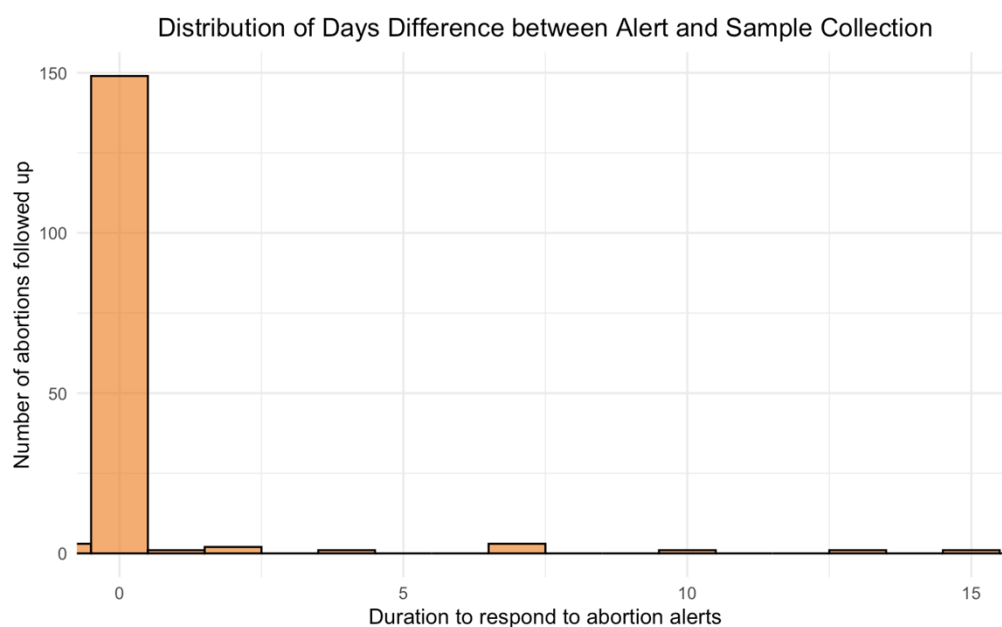

953

954 *S1 Appendix: Delay between alert and investigation (days)*

955

956

957 **S2 Appendix: Questionnaire (Replicated from Predictive Factors and Risk Mapping for Rift**  
958 **Valley Fever Epidemics in Kenya [1]**

02/02/2023, 08:30

Tool 1 (To be filled in by the call center)

**Tool 1 (To be filled in by the call center)**

Checklist for Community early warning system and reporting of abortions

*Every entry is an abortion*

\_\_\_\_\_

1. Unique Id

\_\_\_\_\_

2. Subcounty where abortion is reported

\_\_\_\_\_

3. Village

\_\_\_\_\_

4. Name of the reporter

\_\_\_\_\_

5. Telephone number

\_\_\_\_\_

6. Host species

- Cattle
- Goats
- Sheep

7. Age

\_\_\_\_\_

8. Breed

- Local
- Exotic
- Mixed

9. Number of abortions reported

\_\_\_\_\_

10. Action taken

- Ignored
- Investigated
- Referred

<https://ee.kobotoolbox.org/x/d5eezqxP>

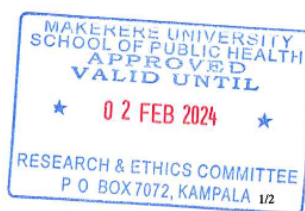

02/02/2023, 08:30

Tool 1 (To be filled in by the call center)

11. Reporting platform

- SMS
- Facebook
- Whatsapp
- Calls

12. Date reported to the call center

yyyy-mm-dd  
\_\_\_\_\_

959

02/02/2023, 08:32

Tool 2 (To be filled in the community)

## Tool 2 (To be filled in the community)

### 1. Unique Id

---

### 2. Gender of the respondent

- Male  
 Female  
 Prefer not to say

### 3. Age

---

### 4. Education level

- PhD  
 Masters  
 Bachelors  
 Diploma  
 Certificate  
 Advanced level  
 Ordinary level  
 Illiterate

### 5. Occupation

---

### 6. Household size

---

### 7. Subcounty

- Birere  
 Endizi  
 Kabingo  
 Kabuyanda  
 Kashumba  
 Kikagate  
 Masha  
 Nyakitunda  
 Ngarama  
 Rugaaga

### 8. Parish

---

### 9. Village

---

### 10. Date for the alert

yyyy-mm-dd

---

### 11. Date for investigation

yyyy-mm-dd

---

### 12. Date for vaginal swab collection

yyyy-mm-dd

---

### 13. Vaginal swab code

---

<https://ee.kobotoolbox.org/x/skXReSS2>

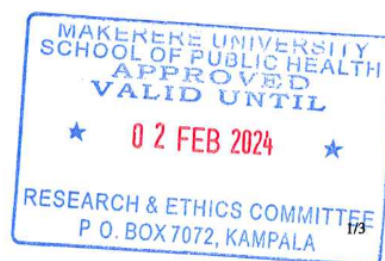

02/02/2023, 08:32

Tool 2 (To be filled in the community)

14. Any clinical presentation of the animal

- High mortality of new-born
- Sudden onset of abortion among pregnant animals
- Weakness /Unsteady gait
- Mucopurulent nasal discharge
- Profuse fetid diarrhea
- High fever
- I don't know

15. Is the animal vaccinated

- Yes
- No

16. Herd size

\_\_\_\_\_

17. Number of animals vaccinated for RVF

\_\_\_\_\_

18. Any environmental features observed

- Bushes
- Recent rainfall (less than 14 days)
- Stagnant water
- Shrubs
- Heavy forests
- Others

Others

\_\_\_\_\_

19. History of animal movement

- Yes
- No

If yes state:

\_\_\_\_\_

20. Origin

\_\_\_\_\_

21. Destination

\_\_\_\_\_

22. Image of animal

Click here to upload file. (< 10MB)

23. GPS coordinates

latitude (x,y °)

\_\_\_\_\_

longitude (x,y °)

\_\_\_\_\_

altitude (m)

\_\_\_\_\_

accuracy (m)

\_\_\_\_\_

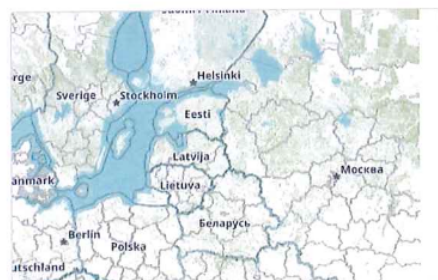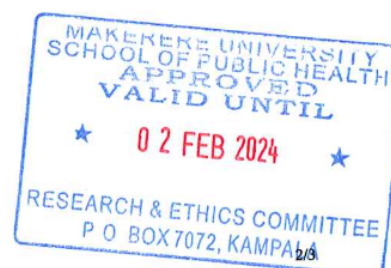

<https://ee.kobotoolbox.org/x/skXRcSS2>

## Tool 3 (To be filled in by the Lab Assistant)

1. Unique Id

---

2. Vaginal swab id

---

3. Number of tests done

---

4. Results of ELISA, IgM

---

5. Mean OD value of each serum sample

---

6. Results of ELISA, IgG

---

7. Mean OD value of each serum sample

---

8. Id of the lab technician

---

9. Date for the results

yyyy-mm-dd

---

<https://ee.kobotoolbox.org/x/N2kkkCff>

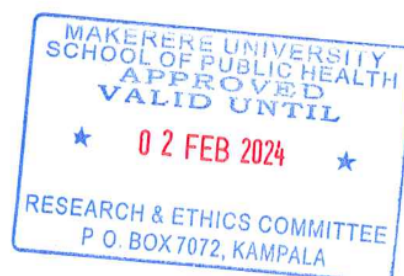

1/1

962  
963  
964  
965  
966  
967

<sup>1</sup>Munyua PM, Murithi RM, Ithondeka P, Hightower A, Thumbi SM, Anyangu SA, Kiplimo J, Bett B, Vrieling A, Breiman RF *et al*: **Predictive Factors and Risk Mapping for Rift Valley Fever Epidemics in Kenya.** *PLoS One* 2016, **11**(1):e0144570.

**UNIVERSITY OF CAMBRIDGE**  
Department Of Veterinary Medicine

**LIVESTOCK ABORTIONS REPORTING IN ISINGIRO DISTRICT**

**RIFT VALLEY FEVER**  
(what everyone needs to know)

**Rift Valley Fever (RVF) is an acute, fever-causing viral disease that several affects domestic and wild animals (such as cattle, sheep & goats) as well as humans.**

**How Do Humans Get RVF**

- As a result of bites from mosquitoes that serve as vectors of RVF
- Direct contact with either blood, meat or other body fluids of infected animals, assisting with animal births.
- Through drinking unpasteurized or uncooked milk or Infected animals

**Please report any abortion to Isingiro call centre to**  
075 259 8184 / 077 356 8057

968  
969

S2 Appendix: IEC Materials for RVF used during sensitizations (Front page)

**TARGET ANIMALS**

- 1 SHEEP
- 2 GOATS
- 3 CATTLE
- 4 BUFALLOS
- 5 CAMELS

**Signs and symptoms**

**In Animals**

- Fever
- Weakness
- Abortions (loss of pregnancy)
- A high rate of severe illness and death, particularly among young animals.

**In Humans**

- Fever
- Weakness
- Back pain
- Dizziness at the onset of illness.

**What to do in case of any community/farm abortions**

If you see any community/farm livestock abortions notify the following stakeholders by WhatsApp, SMS, phone call.

- ★ LC at village, parish, subcounty or district
- ★ VHT member
- ★ Veterinary services provider
- ★ District call centre - 075 259 8184 / 077 356 8057

**Spread of RVF**

- People can get RVF through contact with blood, body fluids, or tissues of infected animals.
- Heavy rains and prolonged flooding increase habitat suitability for vector populations, determining massive hatching of RVF competent mosquitoes (e.g. Aedes and Culex), thus influencing the risk of RVF emergence, transmission spread.

**Please report any abortion to Isingiro call centre to**  
075 259 8184 / 077 356 8057

970  
971

S3 Appendix: IEC Materials for RVF used during sensitizations (Back page)
